# Supplementary material for: Patients’ use and experiences with e-consultation and other digital health services with their general practitioner in Norway: results from an online survey
Source: PubMed Central journal article supplement — BMJ Open. 2020 Jun 17;10(6):e034773. doi: 10.1136/bmjopen-2019-034773 (PMC7304835; doi:10.1136/bmjopen-2019-034773), 2020-06-17
Supplement: bmjopen-2019-034773.draft_revisions.pdf [file bmjopen-2019-034773.draft_revisions.pdf]

# BMJ Open

BMJ Open is committed to open peer review. As part of this commitment we make the peer review history of every article we publish publicly available.

When an article is published we post the peer reviewers' comments and the authors' responses online. We also post the versions of the paper that were used during peer review. These are the versions that the peer review comments apply to.

The versions of the paper that follow are the versions that were submitted during the peer review process. They are not the versions of record or the final published versions. They should not be cited or distributed as the published version of this manuscript.

BMJ Open is an open access journal and the full, final, typeset and author-corrected version of record of the manuscript is available on our site with no access controls, subscription charges or pay-per-view fees (<http://bmjopen.bmj.com>).

If you have any questions on BMJ Open's open peer review process please email [info.bmjopen@bmj.com](mailto:info.bmjopen@bmj.com)

# BMJ Open

**Patients' use and experiences with e-consultation and other digital health services with their general practitioner in Norway: results from an online survey**

|                               |                                                                                                                                                                                                                                                                            |
|-------------------------------|----------------------------------------------------------------------------------------------------------------------------------------------------------------------------------------------------------------------------------------------------------------------------|
| Journal:                      | <i>BMJ Open</i>                                                                                                                                                                                                                                                            |
| Manuscript ID                 | bmjopen-2019-034773                                                                                                                                                                                                                                                        |
| Article Type:                 | Original research                                                                                                                                                                                                                                                          |
| Date Submitted by the Author: | 08-Oct-2019                                                                                                                                                                                                                                                                |
| Complete List of Authors:     | Zanaboni, Paolo; University Hospital of North Norway, Norwegian Centre for E-health Research; UiT Arctic University of Norway, Department of Clinical Medicine<br>Fagerlund, Asbjørn Johansen; University Hospital of North Norway, Norwegian Centre for E-health Research |
| Keywords:                     | Telemedicine < BIOTECHNOLOGY & BIOINFORMATICS, Information technology < BIOTECHNOLOGY & BIOINFORMATICS, Health informatics < BIOTECHNOLOGY & BIOINFORMATICS, GENERAL MEDICINE (see Internal Medicine)                                                                      |
|                               |                                                                                                                                                                                                                                                                            |

SCHOLARONE™  
Manuscripts

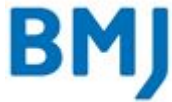

I, the Submitting Author has the right to grant and does grant on behalf of all authors of the Work (as defined in the below author licence), an exclusive licence and/or a non-exclusive licence for contributions from authors who are: i) UK Crown employees; ii) where BMJ has agreed a CC-BY licence shall apply, and/or iii) in accordance with the terms applicable for US Federal Government officers or employees acting as part of their official duties; on a worldwide, perpetual, irrevocable, royalty-free basis to BMJ Publishing Group Ltd ("BMJ") its licensees and where the relevant Journal is co-owned by BMJ to the co-owners of the Journal, to publish the Work in this journal and any other BMJ products and to exploit all rights, as set out in our [licence](#).

The Submitting Author accepts and understands that any supply made under these terms is made by BMJ to the Submitting Author unless you are acting as an employee on behalf of your employer or a postgraduate student of an affiliated institution which is paying any applicable article publishing charge ("APC") for Open Access articles. Where the Submitting Author wishes to make the Work available on an Open Access basis (and intends to pay the relevant APC), the terms of reuse of such Open Access shall be governed by a Creative Commons licence – details of these licences and which [Creative Commons](#) licence will apply to this Work are set out in our licence referred to above.

Other than as permitted in any relevant BMJ Author's Self Archiving Policies, I confirm this Work has not been accepted for publication elsewhere, is not being considered for publication elsewhere and does not duplicate material already published. I confirm all authors consent to publication of this Work and authorise the granting of this licence.

# 1 2 3 1 **Patients' use and experiences with e-consultation and** 4 2 **other digital health services with their general** 5 3 **practitioner in Norway: results from an online survey** 6 7 8 9 4

10 5 **Paolo Zanaboni** <sup>1</sup>: paolo.zanaboni@ehealthresearch.no

11 6 **Asbjørn Johansen Fagerlund** <sup>1</sup>: asbjorn.johansen.fagerlund@ehealthresearch.no

12  
13 7  
14 8 <sup>1</sup> *Norwegian Centre for E-health Research, University Hospital of North Norway, P.O. Box 35, 9038 Tromsø, Norway*  
15  
16 9

## 17 18 10 19 11 **Corresponding author**

20 12 Paolo Zanaboni

21 13 Address: Norwegian Center for E-health Research, University Hospital of North Norway, P.O. Box  
22 14 35, 9038 Tromsø, Norway

23 15 Tel: +47 915 07 766

24 16 Email: paolo.zanaboni@ehealthresearch.no  
25  
26  
27  
28  
29  
30 17

## 31 18 **ABSTRACT**

32 19 **Objectives:** To explore patients' use and experiences with four digital health services implemented  
33 20 in Norway to enable electronic communication between patients and their GP: (1) electronic  
34 21 booking of appointments; (2) electronic prescription renewal; (3) electronic contact with the GP  
35 22 office for non-clinical inquiries; (4) e-consultation for clinical inquiries.

36 23 **Design:** An online survey consisting of quantitative data supplemented by qualitative information  
37 24 was conducted to explore: (1) characteristics of the users; (2) use; (3) experiences, perceived  
38 25 benefits and satisfaction; (4) time spent using the digital health services.  
39  
40  
41  
42  
43  
44  
45  
46  
47  
48  
49  
50  
51  
52  
53  
54  
55  
56  
57  
58  
59  
60

26 **Setting:** Primary care.

27 **Participants:** 2,043 users of the digital health services answering the survey.

28 **Results:** There was a higher proportion of women, younger adults, and digitally active citizens with  
29 high education. Electronic booking of appointments was the most used service (66.4%), followed  
30 by electronic prescription renewal (54.3%). Most users (80%) could more easily and efficiently  
31 book an appointment electronically than by phone. Over 90% of the respondents thought that it was  
32 easier to renew a prescription electronically, 76% obtained a better overview of their medications  
33 and 46% reported higher compliance. For non-clinical inquiries, most respondents (60%) thought  
34 that it was easier to write electronic messages than communicate by phone. For clinical enquiries,  
35 many patients agreed that e-consultation could lead to a better follow-up (72%) and improved

1  
2 1 quality of treatment (58%). Users were highly satisfied with the services and recommended their  
3  
4 2 use to others. Time saving was the most evident benefit for patients. This was confirmed by the  
5  
6 3 differences in time spent using the digital health services compared to conventional approaches, all  
7  
8 4 found to be statistically significant.

9 5 **Conclusions:** Citizens using e-consultation and other digital health services with their GP in  
10  
11 6 Norway are satisfied and consider them as useful and efficient alternatives to conventional  
12  
13 7 approaches.  
14  
15 8

## 16 9 **ARTICLE SUMMARY**

### 17 10 **Strengths and limitations of this study**

- 19 11 • One of the first examples of nationwide implementation of digital health services for citizens in  
20  
21 12 primary care
- 23 13 • The quantitative survey was supplemented by qualitative feedbacks with interesting insights and  
24  
25 14 useful suggestions for improvement
- 26 15 • High number of respondents considered to be representative of those who used the services
- 28 16 • Respondents were early adopters who could be have a more positive attitude
- 30 17 • Findings are relevant to citizens, general practitioners and policy-makers

## 1 **Background**

2 The increasing demand in primary care within a limited capacity and the need to improve patients'  
3 access has prompted the consideration of alternative methods to provide consultations, such as email,  
4 electronic messaging or Internet video [1]. Electronic communication between patients and  
5 physicians has the potential to empower patients [2] and improve health care services [3]. There is  
6 also growing recognition that many patient encounters do not require face-to-face contact, and the  
7 increasing use of the Internet creates the opportunity for electronic consultations (e-consultations),  
8 where the interaction between physician and patient is completely virtual [4].

9 In the early 2000s, a number of studies on e-mail communication between patients and General  
10 Practitioner (GP) were conducted. Patients found e-mail communication easy to use [5,6] and  
11 preferred it over phone calls for the communication of non-urgent problems [5,7,8], including updates  
12 to the GP, prescription renewals, health questions, questions about test results or referrals,  
13 appointments, and requests for non-health-related information [7,8,9]. However, the empirical  
14 evidence for the use of email for clinical communication between patients and healthcare  
15 professionals [10] and for the provision of information on disease prevention and health promotion  
16 [11] is still limited. Despite email being commonly offered by GP offices for making appointments  
17 and renewing prescriptions, its use for direct contact with the GP is not commonplace [12]. Moreover,  
18 the security level for regular email is considered insufficient [3] and non-compliant to current  
19 requirements for authentication and encryption [13].

20 Today, e-consultations are generally done in an asynchronous manner via a secure Internet portal [4].  
21 Web messaging systems address issues around security and liability associated with conventional  
22 email communication since they offer encryption capability and access controls [5,10]. E-  
23 consultations have been considered by patients as equivalent or better than face-to-face visits [14]  
24 and represent an appropriate and potentially cost-saving addition to in-person delivery of primary  
25 care [14,15]. Furthermore, patients also experienced easier access to their GP for minor health

1  
2 1 problems, and received quick responses to their requests [3]. E-consultations can also be conducted  
3  
4 2 through real-time video linkage with the patient [4]. Benefits of video consultations in primary care  
5  
6 3 compared to in-person encounters include convenience, efficiency, communication, privacy, and  
7  
8 4 comfort [16].  
9

10  
11 5 A recent evaluation of an online consultation system that had undergone pilot testing in 36 general  
12  
13 6 practices in South West England found that the use of e-consultations was very low (2 e-consultations  
14  
15 7 per 1,000 patients per month), more common among women and working-age adults, and mostly  
16  
17 8 suitable for administrative requests, such as repeat prescriptions and test results [17]. Despite policy  
18  
19 9 pressure to introduce e-consultations by email, web messaging and video, there is a general reluctance  
20  
21 10 among GPs to implement alternatives to face-to-face consultations [1].  
22  
23

### 24 11 **Digital dialogue with the general practitioner in Norway**

25  
26 12 The «Digital dialogue with the general practitioner» implemented in Norway is a suite of four e-  
27  
28 13 health services which enable secure communication between patients and their GP over the Internet.  
29  
30 14 The four digital services include: (1) an electronic booking service to make appointments with the  
31  
32 15 GP; (2) an electronic prescription service to request renewal of maintenance drugs, with direct  
33  
34 16 integration with the electronic prescription system of pharmacies; (3) a service for electronic contact  
35  
36 17 with the GP office for text-based non-clinical inquiries (e.g. opening hours, results from diagnostic  
37  
38 18 tests) as an alternative to phone calling; (4) a service for e-consultation with the GP for clinical  
39  
40 19 inquiries.  
41  
42  
43  
44  
45  
46

47 20 These services are accessible to residents in Norway aged 16 years or older from the private section  
48  
49 21 of the national portal helsenorge.no available after login. The national health portal helsenorge.no  
50  
51 22 was established in 2011 to provide health information and accommodate digital health services  
52  
53 23 gathered in one place [18]. Secure access is obtained through a unique identification and  
54  
55 24 authentication procedure via a national ID portal with Security Level 4 (the same authentication  
56  
57 25 procedure used for Internet-banking). All the four services are integrated with the GP's electronic  
58  
59 26 patient record (EPR) system. The «Digital dialogue with the general practitioner» is still in its early  
60

1  
2 1 implementation phase and its use by GPs is not mandatory. By December 2018, these services were  
3  
4 2 offered via the national health portal helsenorge.no by a total 293 GP offices (out of 1,542 offices)  
5  
6 3 which volunteered as early adopters [**Figure 1**]. GPs who adhere to this national initiative and offer  
7  
8 4 these services to their patients are able to receive and send sensitive information and communicate  
9  
10 5 digitally via their own EPR system, and the information exchange is documented in the journal. The  
11  
12 6 services can be activated and deactivated by each GP. This makes it possible to use only some of the  
13  
14 7 four services. The services are supported by the Norwegian Health Network and the EPR suppliers.  
15  
16 8 The presented suite of e-health services between patient and GP has the potential to improve the  
17  
18 9 accessibility, quality and efficiency of primary health care. According to the Norwegian Directorate  
19  
20 10 of Health, e-consultation and other digital health services with the GP might result in a number of  
21  
22 11 possible benefits for patients including: digital communication with their GP which ensures  
23  
24 12 confidentiality, information security and privacy; time savings (work, travel, waiting); faster  
25  
26 13 detection or treatment of serious diagnoses; possibility to contact their GP at any time, even when on  
27  
28 14 holiday; easier formulation of a request for health assistance or practical inquiry by written message  
29  
30 15 than by oral communication [19]. Despite these expected benefits, there is limited research-based  
31  
32 16 knowledge of the effects of the implementation of the «Digital dialogue with the general practitioner»  
33  
34 17 in Norway. Governments and vendors have been criticized for being overly optimistic about the  
35  
36 18 expected favorable outcomes from employing digital health services [20], and the realization of these  
37  
38 19 benefits has often been slower than anticipated [21]. There is a strong need for those undertaking the  
39  
40 20 implementation of e-health to understand factors that affect implementation [21]. However, to date,  
41  
42 21 no studies have been performed on large-scale implementation of digital health services for citizens  
43  
44 22 in primary care.

### 23 **Study aim**

24 The aim of the present study was to explore patients' use and experiences with e-consultation and  
25 other digital health services with their GP implemented in Norway. A survey consisting of  
26 quantitative data supplemented by qualitative information was conducted to explore: (1) the



1 characteristics of the users; (2) the use of e-consultation and other digital health services with the GP;  
2 (3) experiences, perceived benefits and satisfaction with e-consultation and other digital health  
3 services with the GP; and (4) time spent using e-consultation and other digital health services with  
4 the GP compared to conventional methods (e.g. phone, office visit).

## 5 **Methods**

### 6 **Description of the digital health services**

7 The «Digital dialogue with the general practitioner» is a suite of four e-health services which enable  
8 secure communication between patients and their GPs over the Internet.

#### 9 *Electronic booking of appointments*

10 The service includes two possible options for electronic booking of appointments. The GP can make  
11 time slots available for electronic booking via helsenorge.no. The patient can choose among the time  
12 slots available in their GP's calendar and book an appointment directly through the  
13 service. Alternatively, the patient can to send an electronic inquiry for an appointment with a text-  
14 based message via the system without selecting a specific time slot. In this case, the GP office will  
15 find a free time slot. This can be useful to book an appointment for children or other relatives who  
16 are not digitally active. Once the patient has been assigned an appointment, the system sends out a  
17 confirmation via SMS. The text message does not contain sensitive information. Each GP can decide  
18 which times slots are made available for electronic booking. The GP can also decide which of the  
19 two alternatives to offer to their patients. Normally, appointments can be made available four to five  
20 weeks in advance.

#### 21 *Electronic prescription renewal*

22 Patients can send a message to their GP and ask for a prescription renewal of maintenance  
23 medications or medical equipment. The prescription service available via helsenorge.no provides an  
24 overview of all prescriptions and which of them are active. The GP office receives a message from  
25

1 the patient into the EPR system containing which prescriptions the patient wishes to renew. It is  
2 possible to ask for renewal of multiple prescriptions within one request. GP offices have established  
3 routines for which types of medications can be renewed without a face-to-face consultation (e.g. by  
4 phone), and this also applies to the electronic prescription renewal service. The doctor who approves  
5 an electronic prescription renewal must make an individual medical assessment of the validity of the  
6 prescription. The most common routine today is to allow prescription renewals without a face-to-face  
7 consultation when maintenance medications must be renewed before the patient is due for control  
8 (with the exception of certain addictive prescription medications). The inquiry for an electronic  
9 prescription renewal contains a free text field with the description of which medications the patient  
10 wishes to renew (name, dosage form, dosage) and an additional comment field. The GP can accept  
11 or reject the request. In both cases, a confirmation is sent to the patient.

### 12 ***Electronic contact with the GP office***

13 This service provides patients with a secure communication channel with the GP office. The service  
14 can be used for text-based non-clinical inquiries (e.g. opening hours, results from diagnostic tests) as  
15 an alternative to a phone call to the reception at the GP office. The service can also be utilized to send  
16 mail digitally to the patient and can include attachments (PDF, JPG or PNG). The questions are  
17 normally answered by the reception at the GP office. The service is not intended for providing health  
18 assistance. Examples where the electronic contact with the GP office can be used include: booking  
19 and confirmation (time, location) of patient transport otherwise done by phone; practical short  
20 questions (e.g. holidays); practical questions before an appointment or clinical examination. Health  
21 personnel can also initiate an electronic dialogue with the patient if the patient is digitally active  
22 (marked in the EHR system). The service is free of charge for the patient. In case a patient should  
23 improperly ask for health assistance via this service, the GP office will ask the patient to initiate an  
24 e-consultation instead.

### 25 ***E-consultation***

1  
2 1 E-consultation is an online text-based clinical consultation with the GP conducted as alternative to a  
3  
4 2 face-to-face appointment. Patients pay the same out-of-pocket fee as for office visits (NOK 155,  
5  
6 3 approximately € 15). To date, this service only applies to known health conditions, and only when  
7  
8 4 physical attendance is not required. Patients need to book a regular appointment if new symptoms or  
9  
10 5 health problems occurs. The service cannot be used for immediate assistance or emergency situations.  
11  
12 6 Examples of situations where e-consultation can be used safely include: follow-up of patients with  
13  
14 7 chronic health conditions (e.g. worsening during treatment); follow-up questions about use of  
15  
16 8 medications (e.g. compliance, side effects, lack of effect); follow-up of mild mental disorders (e.g.  
17  
18 9 events that aggravate anxiety); requests for certificates and statements which do not require re-  
19  
20 10 examination; use of the written documentation from the e-consultation for referral to a specialist.  
21  
22 11 Examples where use of e-consultation is not recommended include: provision of sick leave  
23  
24 12 certificates; assessment of acute exacerbations; occurrence of new health problems which require a  
25  
26 13 new examination (e.g. severe side effects after starting with a new medication); assessment of  
27  
28 14 exacerbations requiring clinical examination (e.g. bothersome rashes and wounds, psychiatric issues  
29  
30 15 which require a dialogue); complex issues which require extensive measures (e.g. worsening of  
31  
32 16 chronic illness with need to review medications in case of multimorbidity); issues unsuccessfully  
33  
34 17 solved in previous e-consultations.  
35  
36  
37  
38  
39  
40  
41 18 The use of e-consultation does not change ordinary treatment liabilities for the GP. The GP must  
42  
43 19 independently assess whether the information provided by the patient is sufficient to be able to  
44  
45 20 provide proper health care. The GP must ask the patient to book an ordinary appointment if in doubt  
46  
47 21 about whether a request can be resolved through an e-consultation. A specific tariff for e-consultation  
48  
49 22 had been introduced since July 1<sup>st</sup> 2016. The e-consultation must include a medical assessment of the  
50  
51 23 patient's request and is considered completed when the doctor has considered the inquiry and given  
52  
53 24 the patient an answer. The GP is obliged to answer the patient's inquiry within 5 working days.  
54  
55  
56  
57

## 58 25 **Study design**

59  
60

1  
2 1 We conducted an open online survey of users who had activated their personal account at the national  
3  
4 2 health portal helsenorge.no and accessed at least one of the four e-health services online. Only citizens  
5  
6 3 with access to the services by November 2017 were invited to participate. The survey was available  
7  
8 4 after secure login on the national health portal helsenorge.no. All active users who accessed one of  
9  
10 5 the four digital health services with their GP received an invitation through a pop-up window with a  
11  
12 6 brief description of the study and a link to the survey.  
13  
14  
15

16 7 The online survey included questions regarding demographic characteristics of the users and use of  
17  
18 8 the services. Moreover, for each of the four e-health services with the GP, respondents were asked  
19  
20 9 about their experiences with the service and the time spent using the service compared to conventional  
21  
22 10 methods (e.g. phone, office visit). Demographic characteristics of the users included information on  
23  
24 11 gender, age, education level, health-related background, computer literacy, and work status. Use of  
25  
26 12 the services was explored through questions related to which of the four e-health services had been  
27  
28 13 accessed by the respondents and, for electronic booking of appointments only, which of the two  
29  
30 14 possible options was used. Patients' experiences with the services were evaluated through a number  
31  
32 15 of questions concerning perceived benefits (quality of care, communication with the GP office,  
33  
34 16 formulation of an inquiry, efficiency) and satisfaction (with technology, security, information and  
35  
36 17 educational material, overall satisfaction, and future use).  
37  
38  
39  
40  
41

42 18 Questions on demographic characteristics and use of the services were multiple choice with a number  
43  
44 19 of alternatives ranging from 2 to 8 depending on the questions. Questions concerning users'  
45  
46 20 experiences were scored on a 5-point Likert scale (1=strongly agree, 2=agree, 3=neutral, 4=disagree,  
47  
48 21 5=strongly disagree). Respondents were also able to refrain from providing an answer by selecting  
49  
50 22 "no opinion". One non-mandatory open-ended question was also included for each of the four e-  
51  
52 23 health services. The information was provided only by those respondents who were willing to provide  
53  
54 24 additional feedbacks on their experience with the service.  
55  
56  
57

58 25 The online survey was developed by the Norwegian Centre for E-health Research in collaboration  
59  
60 26 with the Centre for Quality Improvement in Medical Practice (SKIL) and the Norwegian Directorate

1 of eHealth. The survey was published on the national portal helsenorge.no by the Norwegian  
2 Directorate of eHealth. The link to the survey was available for a period of 2 weeks. All information  
3 collected through the survey was anonymized and not personally identifiable. The Checklist for  
4 Reporting Results of Internet E-Surveys (CHERRIES) was used to develop the survey and report its  
5 results [22]. The online survey was developed with the online data collection solution Questback  
6 Essentials (Oslo, Norway) and its technical functionality tested before being published.

### 7 **Data analysis**

8 Respondents were analyzed by gender and age according to the following groups: 16-24 year, 25-34  
9 year, 35-44 year, 45-54 year, 55-64 year, and over 65 year. Population data for the year 2017 were  
10 retrieved from Statistics Norway and used to compare the demographic characteristics of the users of  
11 digital health services in primary care with patients attending their GP face-to-face and the general  
12 population. Participation and completion rates were not reported as data on unique visitors were not  
13 available. The selection of respondents to this survey was assumed to be representative of those who  
14 actually used the services. Data on patients' use and experiences with the service were summarized  
15 by descriptive statistics as well as by diagrams. In the analysis of the questions concerning users'  
16 satisfaction with the service, results were summarized by the proportion of respondents who agreed  
17 with a certain aspect (scores 1 and 2) and those who disagreed (scores 4 and 5). Differences between  
18 time spent using e-consultation and other digital health services with the GP and time spent via  
19 conventional methods (e.g. phone, office visit) were analyzed with the Wilcoxon signed-rank test. A  
20 P-value < 0.05 was considered significant.

21 Qualitative data provided in the open text fields for each of the four e-health services were used to  
22 support and supplement the quantitative data. The content of these answers was analyzed and  
23 categorized into "positive" (e.g. perceived benefits, good user experiences), "neutral" or "negative"  
24 (perceived disadvantages, poor user experiences, suggestions for service improvement). Answers  
25 categorized as "negative" were further analyzed in detail as these were found to be more significant  
26 and diverse than those categorized as "positive" (often described by short statements such as

1  
2 1 “working fine for me”). Answers were subject to a content analysis [29] and summarized into two  
3  
4 2 levels: i) common opinions reported by several respondents, and ii) individual opinions containing  
5  
6 3 strong anecdotal experiences.  
7  
8

9 4 Data analysis was performed by the Norwegian Centre for E-health Research from January 2017 to  
10  
11 5 April 2018. Data were extracted in Excel and further analyzed in IBM SPSS Statistics (Version 25.0,  
12  
13 6 Armonk, NY: IBM Corp.).  
14  
15

## 16 7 **Patient and public involvement**

17  
18  
19 8 The four e-health services evaluated in this study were part of a national initiative led by the  
20  
21 9 Norwegian Directorate of eHealth. The services were implemented on a large-scale and accessible to  
22  
23 10 residents in Norway from the national portal helsenorge.no. It was therefore not possible to involve  
24  
25 11 patients or the public in the design, conduct or reporting of our research. The results of this study,  
26  
27 12 however, will be disseminated to the public as well as to health authorities to support the further  
28  
29 13 development of these services and their features.  
30  
31  
32  
33

## 34 14 **Results**

### 35 15 **Characteristics of the users**

36  
37  
38 16 The online survey was available on the national portal helsenorge.no from 14<sup>th</sup> November 2017 to  
39  
40 17 28<sup>th</sup> November 2017. In total 2,043 users answered to the survey [Table 1]. There was a higher  
41  
42 18 proportion of women among users of digital health services in primary care (64.9%) compared to  
43  
44 19 citizens attending their GP face-to-face (59.4%) and the general population (49.8%). Users in all age  
45  
46 20 groups accessed the services. There was a higher proportion of younger users [Additional file 1]  
47  
48 21 compared to citizens attending their GP face-to-face [Additional file 2] and the general population  
49  
50 22 [Additional file 3]. Moreover, there were more women among younger users, while there were more  
51  
52 23 men among older users.  
53  
54  
55  
56  
57  
58

59 24 Over half of the users (59%) had an education at university level or higher. Only 5.8% of the  
60  
25 respondents had an education at primary or secondary school level. About a fourth of the respondents

1 had a background as health professionals. The vast majority of the respondents described their data  
2 literacy as average or above average, while only 5.4% of the users had a low data literacy. Over half  
3 of the respondents was working at the time they answered to this survey.

#### 4 **Patients' use of the services**

5 Electronic booking of appointments was the most used of the four digital health services with the GP  
6 (66.4%), followed by electronic prescription renewal (54.3%) [Table 2]. The two other services  
7 which implied a dialogue the GP office were used to a lesser degree. Almost half of the respondents  
8 accessed only one of the four digital health services, while only 7.6% of the respondents used all the  
9 services. Electronic booking via the GP's calendar was the most commonly used option to book  
10 appointments, while sending an electronic inquiry for an appointment with a text-based message was  
11 reported as less used. About 20% of the respondents used both solutions.

#### 12 **Electronic booking of appointments**

13 Over 80% of the respondents considered it easier to book an appointment through the electronic  
14 service compared to booking via phone or SMS [Figure 2]. Over half of the users agreed that they  
15 could book an appointment at a more appropriate time and within shorter time. Most users agreed  
16 that the technology worked well (90%), that the service was safe (93%) and that the information  
17 provided on how to use the service was sufficient (81%). Overall, the vast majority of the users were  
18 satisfied with the service (90%) and would recommend its use to others (85%).

19 Over 80% of the respondents agreed that they saved time by booking an appointment electronically  
20 [Figure 2]. Data showed that, while patients used on average 13.5 minutes to book an appointment  
21 by phone, it took only 4.4 minutes to book an appointment electronically via helsenorge.no, meaning  
22 a time saving of 9.1 minutes (-67.4%). The difference was statistically significant ( $p < 0.001$ ).

#### 23 **Electronic prescription renewal**

24 Over 90% of the respondents thought that it was easier to renew a prescription electronically than by  
25 phone [Figure 2]. Most users (76%) agreed that they obtained a better overview of their medications

1  
2 1 after using the service, and about half of the respondents (46%) reported that it was easier to follow  
3  
4 2 their doctors' advice on use of medications. Most users agreed that the technology worked well  
5  
6 3 (93%), that the service was safe (95%) and that the information provided on how to use the service  
7  
8 4 was sufficient (81%). Overall, respondents were highly satisfied with the service (93%) and would  
9  
10 5 recommend its use to others (88%).  
11

12  
13  
14 6 Over 90% of the users agreed that they saved time by renewing a prescription electronically [**Figure**  
15  
16 7 **2**]. Patients saved, on average, 10.5 minutes (-70.9%) each time they renewed a prescription  
17  
18 8 electronically compared to a renewal by phone ( $p<0.001$ ). While it took 14.8 minutes to request to  
19  
20 9 renew a prescription by phone, an electronic prescription renewal via helsenorge.no took only 4.3  
21  
22 10 minutes.  
23

### 24 11 **Electronic contact with the GP office**

25  
26 12 Over 80% of the respondents agreed that the service allowed for an easier communication with the  
27  
28 13 GP office [**Figure 2**]. In particular, 60% of the users thought that it was easier to send a written  
29  
30 14 inquiry electronically than by phone. The vast majority of the users agreed that the technology worked  
31  
32 15 well (87%) and that the service was safe (91%). While the majority of the users (69%) was satisfied  
33  
34 16 with the information provided on how to use the service, a higher percentage (11%) compared to the  
35  
36 17 other services thought that the information was not sufficient. Overall, most users were satisfied with  
37  
38 18 the service (82%) and would recommend its use to others (77%).  
39

40  
41  
42 19 Three-fourths (76%) of the respondents agreed that they saved time by sending an electronic enquiry  
43  
44 20 to the GP office rather than taking contact by phone [**Figure 2**]. Data showed that, while patients used  
45  
46 21 on average 15.2 minutes to the GP office by phone, it took only 5.7 minutes to send an electronic  
47  
48 22 inquiry via helsenorge.no, with a consequent time saving of 9.5 minutes (-62.5%). The difference  
49  
50 23 was statistically significant ( $p<0.001$ ).  
51

### 52 24 **E-consultation**



1 Results showed that 72% of the respondents experienced a better follow-up by their GP as a  
2 consequence of using e-consultation, and an additional 58% reported improved quality of their  
3 treatment [Figure 2]. While 41% of the respondents agreed that it was easier to explain a clinical  
4 problem by written message than by oral communication, 24% expressed their preference towards a  
5 traditional face-to-face appointment. The out-of-pocket fee was deemed to be acceptable by 64% of  
6 the respondents. Most users agreed that the technology worked well (92%) and that the service was  
7 safe (92%). As for electronic contact with the GP office, 11% of the users thought that the information  
8 provided on how to use the service was not sufficient. Overall, respondents were very satisfied with  
9 the service (85%) and would recommend its use to others (81%).

10 Almost 90% of the users agreed that they saved time by sending a clinical inquiry via the service  
11 compared to attending a face-to-face visit. [Figure 2]. Patients saved, on average, more than one hour  
12 (72.3 minutes; -88.5%) each time they used an e-consultation instead of a face-to-face appointment  
13 ( $p < 0.001$ ). While it took, on average, 81.7 minutes for a face-to-face appointment (including travel  
14 time, waiting time, and visit time), an online text-based clinical consultation with the GP took only  
15 9.4 minutes.

### 16 **Qualitative feedback on the services**

17 A total of 656 comments were provided in the open text fields. Most of the comments concerned the  
18 electronic booking of appointments, while e-consultation had the lowest number of answers. About  
19 half of the comments were categorized as negative feedbacks describing perceived disadvantages,  
20 poor user experiences, as well as suggestions for service improvement, such as new functionalities.  
21 The most commonly occurring responses and some individual opinions were selected for each service  
22 [Table 3]. Moreover, four common themes across services were identified.

#### 23 *Safety and security*

1  
2 1 Respondents pointed out that they were uncertain about who read the information they send (e.g.  
3  
4 2 receptionist, GP). Moreover, they indicated the need for a confirmation that the request was sent and  
5  
6 3 received by the GP office, and information on when they could expect an answer.  
7  
8

#### 9 4 *User friendliness*

10  
11  
12 5 Several respondents pointed out that the interface was generally slow and little intuitive, and that it  
13  
14 6 worked poorly on certain web browsers, operating systems and devices.  
15  
16

#### 17 7 *Time utilization*

18  
19  
20 8 Some respondents indicated that the time elapsed from when they contacted the GP office until they  
21  
22 9 received an answer was perceived as more important than the time spent in using the service,  
23  
24 10 depending on the nature of the problem, occupational status and personal characteristics. GP offices  
25  
26 11 tend to keep a few slots daily available for acute visits, which can only be booked by phone. On the  
27  
28 12 one hand, if patients wanted to visit their GP as soon as possible, they might prefer to book an  
29  
30 13 appointment by phone. On the other hand, full-time workers who do not have urgent issues would  
31  
32 14 value the possibility of asynchronous communication and spend the least amount of time.  
33  
34  
35

#### 36 15 *Functionality for parents*

37  
38  
39 16 Many of the respondents pointed out the lack of a functionality to manage their children's medical  
40  
41 17 contact through the services.  
42  
43

## 44 18 **Discussion**

45  
46  
47  
48 19 The «Digital dialogue with the general practitioner» introduced in Norway since 2016 is one of the  
49  
50 20 first examples of nationwide implementation of digital health services for citizens in primary care.  
51  
52 21 The current study provides evidence on patients' use and experiences with e-consultation and other  
53  
54 22 digital health services with their GP. Overall, the services have been used by early adopters  
55  
56 23 (approximately 20% of all GPs offices) and the trend over the first three years of implementation  
57  
58 24 showed a steadily growing nationwide adoption. According to the technology adoption curve [23],  
59  
60

1  
2 1 the majority of users is expected to adopt the services within the next few years. From January 2018  
3  
4 2 to October 2018, the use of e-consultations in Norway grew from 0.8% to 2.2% of the total number  
5  
6 3 of consultations with the GP [24]. Future use of e-consultations is estimated to account to 30% of all  
7  
8 4 consultations with the GP [24], and up to 40% if supported by apps and wearables [25]. Similarly,  
9  
10 5 regions in Denmark have recently set a political ambition that one third of all consultations with the  
11  
12 6 GP will be digital [26]. While electronic booking of appointments and electronic prescription renewal  
13  
14 7 seem to be widely used by patients in Norway, e-consultation and electronic contact with the GP  
15  
16 8 office are still used at a lower degree, as indicated in a recent qualitative study [27]. Our findings are  
17  
18 9 in line with other studies where the use of e-consultation was low and mostly suitable for  
19  
20 10 administrative requests, such as repeat prescriptions and test results [6,17]. In our case, electronic  
21  
22 11 prescription renewal and electronic contact with the GP office were introduced as separate services  
23  
24 12 from e-consultation.

25  
26  
27  
28  
29  
30 13 Time saving (work, travel, waiting) represents the most evident benefit for patients. In a study on use  
31  
32 14 of e-mail communication with the GP, 95% of the users perceived it as more efficient than the phone  
33  
34 15 [7]. In the current survey, the majority of patients (85%, 92%, 76% and 89% for electronic booking  
35  
36 16 of appointments, electronic prescription renewal, electronic contact with the GP office and e-  
37  
38 17 consultation, respectively) agreed that the services were time saving. This was confirmed by the  
39  
40 18 differences in time spent using the digital health services compared to conventional approaches, all  
41  
42 19 found to be statistically significant. The highest efficiency (-88.5%) was estimated for e-consultations  
43  
44 20 compared to face-to-face appointments. However, some users indicated that the time elapsed from  
45  
46 21 when they contacted the GP office until they received an answer was more important than the time  
47  
48 22 spent in using the service. Response time is recognized as an important factor in the delivery of digital  
49  
50 23 health services in primary care. Findings from previous studies reported that the majority of patients  
51  
52 24 received a response within 2 days [5,17] and that a slow response was the main reason for  
53  
54 25 dissatisfaction [5]. Despite e-consultations implemented in Norway are used for non-urgent health  
55  
56  
57  
58  
59  
60

1  
2 1 issues only, and the GP is obliged to answer the patient's inquiry within 5 working days, quicker  
3  
4 2 response times might further improve patient satisfaction.  
5

6  
7 3 Most users seemed to acknowledge the practical utility of digital services with their GP. Patients  
8  
9 4 could easily and efficiently book an appointment electronically, at a time more appropriate to them  
10  
11 5 and with a shorter waiting time compared to booking via phone. Electronic prescription renewals  
12  
13 6 were also preferred to renewals made at the GP office. Patients also recognized that they obtained a  
14  
15 7 better overview of their medications and even a higher compliance. For non-clinical inquiries, most  
16  
17 8 respondents thought that it was easier to write electronic messages to the GP office than communicate  
18  
19 9 by phone. For clinical enquiries, many patients agreed that use of e-consultation could lead to a better  
20  
21 10 follow-up and even to improved quality of treatment, as suggested by other studies [7]. These were,  
22  
23 11 however, perceived benefits. More systematic research is needed to measure objectively clinical and  
24  
25 12 other outcomes of interest, including cost-effectiveness and health service resource use [12]. Users  
26  
27 13 seemed to be generally satisfied with their ability to explain a problem via e-consultation. Compared  
28  
29 14 to oral communication, written communication has been considered more intimate [28], as patients  
30  
31 15 can feel more emboldened to ask questions electronically [7]. Moreover, electronic messages can  
32  
33 16 support patients aiding recall and providing evidence of the exchange [7,8]. However, it is important  
34  
35 17 that messages are concise, formal, and medically relevant [6].  
36  
37  
38  
39  
40  
41

42 18 The overall satisfaction expressed by the respondents of this survey with e-consultation and digital  
43  
44 19 health services with their GP was very high. Such result is not surprising and confirms that patients  
45  
46 20 have a positive attitude towards e-health services in primary care. Electronic communication with the  
47  
48 21 GP office has been considered convenient [9,16,28,29], appropriate [6,14], accessible [3,5,28], and  
49  
50 22 easy to use [3,5] by patients. Moreover, despite providers' reluctance [1] and concerns about patients'  
51  
52 23 inappropriate and inefficient use of the technology [6], patients find the electronic communication  
53  
54 24 with their GPs efficient compared to phone or face-to-face contacts [5,7]. The results from our survey  
55  
56 25 indicated that the information provided to patients on how to use the services was generally  
57  
58 26 satisfactory, but could be improved. GPs previously reported that that the electronic contact with the  
59  
60

1  
2 1 GP office was sometimes confused by the patients with e-consultation [27]. Such confusion was also  
3  
4 2 expressed by a number of respondents to this survey. Improved patient education is needed to avoid  
5  
6 3 improper use and inefficiency [7]. Other suggestions were provided in the open text fields, which  
7  
8 4 included mostly feedbacks from users who were somewhat dissatisfied. Some users expressed their  
9  
10 5 wish to use the services on behalf of their children. Furthermore, the need for a receipt (e.g. that the  
11  
12 6 request has been successfully delivered, read by the receiver or being handled) was in demand. As  
13  
14 7 these services were new, the frustration caused by technical issues could make some people who try  
15  
16 8 them for the first time to go back to the traditional alternatives. It is therefore important to make the  
17  
18 9 services functional on all platforms and easily accessible to all users, as well as provide adequate  
19  
20 10 training [30].  
21  
22  
23  
24

25 11 The results from this survey confirm that users of digital health services in primary care are more  
26  
27 12 likely to be women [17,24,31] and younger adults [4,7,24,31]. These services seem to be more  
28  
29 13 attractive to digitally active users with a higher education, as also reported by other studies [7]. Over  
30  
31 14 half of the users (59%) had an education at university level, which is high compared to the general  
32  
33 15 population and those accessing their GP face-to-face. Data from Statistics Norway show that, in 2017,  
34  
35 16 33.4% of the total population over 16 in Norway had an education at university level. Moreover, the  
36  
37 17 vast majority of the respondents (94.6%) described their data literacy as average or above average.  
38  
39 18 Consequently, elderly and people with low computer literacy might still need traditional alternatives  
40  
41 19 [26]. Despite these digital health services currently catering to competent health users, less competent  
42  
43 20 users would still benefit indirectly if such services succeed in freeing up resources in primary care.  
44  
45 21 Reduced phone load, increased efficiency, released time for medical assessments and less crowded  
46  
47 22 waiting rooms are, for example, advantages for GP offices which have been acknowledged in a recent  
48  
49 23 study conducted on GP's perceptions towards the use of "Digital dialogue with the General  
50  
51 24 Practitioner" [27].  
52  
53  
54  
55  
56  
57

58 25 ***Study strengths and limitations***  
59  
60

1  
2 1 GPs offering digital health services to citizens in Norway are early adopters. As a consequence, they  
3  
4 2 might have a more positive attitude towards innovation than the general GP population and thus be  
5  
6 3 more enthusiastic in inviting their patients to use these services. On the other hand, the services are  
7  
8 4 initiated directly by patients who, as early adopters, could be more inclined to use the services. Since  
9  
10 5 the survey was completely anonymous, the potential number of patients using digital services in  
11  
12 6 primary care who could have answered this survey was unknown. As a consequence, it was not  
13  
14 7 possible to calculate a response rate. Despite this, the «Digital dialogue with the general practitioner»  
15  
16 8 is one of the first examples of nationwide implementation of digital health services for citizens in  
17  
18 9 primary care, and the high number of respondents to this survey is considered to be representative of  
19  
20 10 those who used the services.  
21  
22  
23  
24

25 11 The comments provided in the open text fields were optional, and thus the qualitative results only  
26  
27 12 reflect the opinion of a minority of users who were sufficiently motivated to provide a feedback. As  
28  
29 13 such, these comments are not representative of all users of digital health services. However, they do  
30  
31 14 provide interesting insights and useful suggestions for improvement.  
32  
33  
34  
35  
36  
37

## 38 16 **Conclusions**

39  
40  
41 17 Citizens using e-consultation and other digital health services with their GP in Norway are highly  
42  
43 18 satisfied and consider them as useful and efficient alternatives to conventional approaches. These  
44  
45 19 digital health services are currently catering to competent health users, mostly women, younger  
46  
47 20 adults, and digitally active citizens with high education. It is important to make the services functional  
48  
49 21 on all platforms and provide adequate information and training so that they become easily accessible  
50  
51 22 to all users, including citizens who are not digitally active.  
52  
53  
54  
55  
56  
57

## 58 24 **List of abbreviations**

59  
60 25 **GP:** general practitioner

1  
2 1 **E-consultation:** electronic consultation

3  
4  
5 2 **EPR:** electronic patient record

6  
7  
8 3

9  
10 4 **Declarations**

11  
12  
13  
14 5 **Funding**

15  
16 6 This study was funded by the Norwegian Centre for E-health Research as part of the project  
17  
18  
19 7 “Nytteeffektene av digitale helsetjenester”.

20  
21  
22 8 **Competing interests**

23  
24  
25 9 The authors declare that they have no competing interests.

26  
27 10 **Authors’ contributions**

28  
29  
30 11 PZ contributed to the conception and design of the study, acquisition of data, analysis and  
31  
32  
33 12 interpretation of data, drafting and revision of the manuscript. AJF contributed to the conception and  
34  
35 13 design of the study, analysis and interpretation of data, and revision of the manuscript. All authors  
36  
37 14 read and approved the final manuscript.

38  
39  
40 15 **Ethics approval and consent to participate**

41  
42  
43 16 All information collected through the survey was anonymous and not personally identifiable. The  
44  
45 17 participation to the survey was based on consent wherein the respondent could choose not to answer  
46  
47 18 the questionnaire. Ethics approval from the Regional Committees for Medical and Health Research  
48  
49  
50 19 Ethics was not deemed necessary according to the Act on medical and health research (the Health  
51  
52 20 Research Act) entered into force in Norway in 2009.

53  
54  
55 21 **Data sharing**

56  
57  
58 22 The dataset analyzed during the current study is available from the corresponding author on  
59  
60 23 reasonable request.

1  
2 1 **Acknowledgements**  
3

4  
5 2 We thank the Norwegian Directorate of eHealth for publishing the survey on the national portal  
6  
7 3 helsenorge.no.  
8

9  
10 4 **Word count**  
11

12  
13 5 5574 words.  
14  
15  
16  
17  
18  
19  
20  
21  
22  
23  
24  
25  
26  
27  
28  
29  
30  
31  
32  
33  
34  
35  
36  
37  
38  
39  
40  
41  
42  
43  
44  
45  
46  
47  
48  
49  
50  
51  
52  
53  
54  
55  
56  
57  
58  
59  
60

For peer review only



## References

1. **Brant** H, Atherton H, Ziebland S, McKinstry B, Campbell JL, Salisbury C. Using alternatives to face-to-face consultations: a survey of prevalence and attitudes in general practice. *Br J Gen Pract*. 2016 Jul;66(648):e460-6. PMID: 27215571
2. **Santana** S, Lausen B, Bujnowska-Fedak M, Chronaki CE, Prokosch HU, Wynn R. Informed citizen and empowered citizen in health: results from an European survey. *BMC Fam Pract*. 2011 Apr 16;12:20. PMID: 21496309
3. **Tjora** A, Tran T, Faxvaag A. Privacy vs usability: a qualitative exploration of patients' experiences with secure Internet communication with their general practitioner. *J Med Internet Res*. 2005 May 31;7(2):e15. PMID: 15998606
4. **Mehrotra** A, Paone S, Martich GD, Albert SM, Shevchik GJ. Characteristics of patients who seek care via eVisits instead of office visits. *Telemed J E Health*. 2013 Jul;19(7):515-9. PMID: 23682589
5. **Liederman** EM, Morefield CS. Web messaging: a new tool for patient-physician communication. *J Am Med Inform Assoc*. 2003 May-Jun;10(3):260-70. PMID: J Am Med Inform Assoc. 2003 May-Jun;10(3):260-70. PMID: 12626378
6. **White** CB, Moyer CA, Stern DT, Katz SJ. A content analysis of e-mail communication between patients and their providers: patients get the message. *J Am Med Inform Assoc*. 2004 Jul-Aug;11(4):260-7. PMID: 15064295
7. **Houston** TK, Sands DZ, Jenckes MW, Ford DE. Experiences of patients who were early adopters of electronic communication with their physician: satisfaction, benefits, and concerns. *Am J Manag Care*. 2004 Sep;10(9):601-8. PMID: 15515992
8. **Car** J, Sheikh A. Email consultations in health care: 2--acceptability and safe application. *BMJ*. 2004 Aug 21;329(7463):439-42. PMID: BMJ. 2004 Aug 21;329(7463):439-42. PMID: 15321903
9. **Virji** A, Yarnall KS, Krause KM, Pollak KI, Scannell MA, Gradison M, Østbye T. Use of email in a family practice setting: opportunities and challenges in patient- and physician-initiated communication. *BMC Med*. 2006 Aug 15;4:18. PMID: 16911780
10. **Atherton** H, Sawmynaden P, Sheikh A, Majeed A, Car J. Email for clinical communication between patients/caregivers and healthcare professionals. *Cochrane Database Syst Rev*. 2012 Nov 14;11:CD007978. PMID: 23152249
11. **Sawmynaden** P, Atherton H, Majeed A, Car J. Email for the provision of information on disease prevention and health promotion. *Cochrane Database Syst Rev*. 2012 Nov 14;11:CD007982. PMID: 23152250
12. **Atherton** H. Use of email for consulting with patients in general practice. *Br J Gen Pract*. 2013 Mar;63(608):118-9. PMID: 23561755
13. **Helse- og omsorgsdepartementet**. Høring: Forslag til ny forskrift om pasientjournal (pasientjournalforskriften). 2018. [https://www.regjeringen.no/contentassets/bc66ebd8e7714bf6b0f3753e7c1dcdca/hoerings\\_pasientjournalforskriften.pdf](https://www.regjeringen.no/contentassets/bc66ebd8e7714bf6b0f3753e7c1dcdca/hoerings_pasientjournalforskriften.pdf) Accessed 20 May 2019.
14. **Albert** SM, Shevchik GJ, Paone S, Martich GD. Internet-based medical visit and diagnosis for common medical problems: experience of first user cohort. *Telemed J E Health*. 2011 May;17(4):304-8. PMID: 21457013
15. **Baker** L, Rideout J, Gertler P, Raube K. Effect of an Internet-based system for doctor-patient communication on health care spending. *J Am Med Inform Assoc*. 2005 Sep-Oct;12(5):530-6. PMID: 15905484
16. **Powell** RE, Henstenburg JM, Cooper G, Hollander JE, Rising KL. Patient Perceptions of Telehealth Primary Care Video Visits. *Ann Fam Med*. 2017 May;15(3):225-229. PMID: 28483887
17. **Edwards** HB, Marques E, Hollingworth W, Horwood J, Farr M1, Bernard E, Salisbury C, Northstone K. Use of a primary care online consultation system, by whom, when and why: evaluation of a pilot observational study in 36 general practices in South West England. *BMJ Open*. 2017 Nov 22;7(11):e016901. PMID: 29167106
18. **Sørensen** T, Johansen MA. Developing and Implementing Patients' Full-Scale Electronic Access to Their Health Record. *Stud Health Technol Inform*. 2016;228:85-9. PMID: 27577347
19. **Helsedirektoratet**. Digital dialog mellom pasient og fastlege: nåsituasjon. Delleveranse i arbeid med gevinstrealisering. 2014.
20. **Himmelstein** DU, Woolhandler S. Hope and hype: predicting the impact of electronic medical records. *Health Aff (Millwood)*. 2005 Sep-Oct;24(5):1121-3. PMID: 16162553
21. **Ross** J, Stevenson F, Lau R, Murray E. Factors that influence the implementation of e-health: a systematic review of systematic reviews (an update). *Implement Sci*. 2016 Oct 26;11(1):146. PMID: 27782832
22. **Eysenbach** G. Improving the quality of Web surveys: the Checklist for Reporting Results of Internet E-Surveys (CHERRIES). *J Med Internet Res*. 2004 Sep 29;6(3):e34. PMID: 15471760
23. **Rogers** EM. Diffusion of innovations. New York: The Free Press; 1983.
24. **Helsedirektoratet**, Direktoratet for e-helse. E-konsultasjon hos fastlege og legevakt. Rapport til helse- og omsorgsdepartementet. 2018. <https://ehelse.no/Documents/Nasjonale%20utvalg/NUFA/Vedlegg%208A%20Sak%209-19%20E-Konsultasjon.pdf> Accessed 20 May 2019.
25. **Accenture**. Vårt nye digitale norge. Fremtidige muligheter og hva som kreves for å lykkes med digitalisering av offentlige tjenester. [https://www.accenture.com/\\_acnmedia/PDF-59/Accenture-Digitale-Norge-2.pdf#zoom=50](https://www.accenture.com/_acnmedia/PDF-59/Accenture-Digitale-Norge-2.pdf#zoom=50) Accessed 20 May 2019.
26. **Danske regioner**. Trygt, nært og nemt. Regionernes strategi for fremtidens sundhedsvæsen. 2018. <http://www.e-pages.dk/regioner/148/html5/> Accessed 20 May 2019.
27. **Fagerlund** AJ, Holm IM, Zanaboni P. General practitioners' perceptions towards the use of digital health services for citizens in primary care: a qualitative interview study. *BMJ Open*. 2019 May 5;9(5):e028251. PMID: 31061056
28. **Katz** SJ, Moyer CA, Cox DT, Stern DT. Effect of a triage-based E-mail system on clinic resource use and patient and physician satisfaction in primary care: a randomized controlled trial. *J Gen Intern Med*. 2003 Sep;18(9):736-44. PMID: 12950483
29. **Leong** SL, Gingrich D, Lewis PR, Mauger DT, George JH. Enhancing doctor-patient communication using email: a pilot study. *J Am Board Fam Pract*. 2005 May-Jun;18(3):180-8. PMID: 15879565
30. **Lugtenberg** M, Pasveer D, van der Weijden T, Westert GP, Kool RB. Exposure to and experiences with a computerized decision support intervention in primary care: results from a process evaluation. *BMC Fam Pract*. 2015 Oct 16;16:141. PMID: 26474603
31. **Socialstyrelsen**. Digitala vårdtjänster riktade till patienter. Kartläggning och uppföljning. 2018. <https://www.socialstyrelsen.se/Lists/Artikelkatalog/Attachments/21111/2018-11-2.pdf> Accessed 20 May 2019.

# Tables

**Table 1.** Demographic characteristics of the users.

|                                         |              |
|-----------------------------------------|--------------|
| Users (n)                               | 2,043        |
| Gender, n (%)                           |              |
| Male                                    | 717 (35.1%)  |
| Female                                  | 1326 (64.9%) |
| Age, n (%)                              |              |
| 16-24                                   | 153 (7.5%)   |
| 25-34                                   | 394 (19.3%)  |
| 35-44                                   | 350 (17.1%)  |
| 45-54                                   | 440 (21.5%)  |
| 55-64                                   | 387 (18.9%)  |
| over 65                                 | 319 (15.6%)  |
| Education, n (%)                        |              |
| Primary school / lower secondary school | 119 (5.8%)   |
| High school (general)                   | 407 (19.9%)  |
| High school (vocational)                | 304 (14.9%)  |
| University (3 years)                    | 644 (31.5%)  |
| University (more than 3 years)          | 569 (27.9%)  |
| Health-related background, n (%)        |              |
| Yes                                     | 509 (24.9%)  |
| No                                      | 1534 (75.1%) |
| Data literacy, n (%)                    |              |
| Far below average                       | 24 (1.2%)    |
| Below average                           | 86 (4.2%)    |
| Average                                 | 984 (48.2%)  |
| Above average                           | 738 (36.1%)  |
| Far above average                       | 211 (10.3%)  |
| Work status, n (%)                      |              |
| Working                                 | 1159 (56.7%) |
| Homemaker                               | 15 (0.7%)    |
| Retired                                 | 266 (13.0%)  |
| Unemployed                              | 44 (2.2%)    |
| Student                                 | 132 (6.5%)   |
| Sick leave                              | 187 (9.2%)   |
| Disability pension                      | 186 (9.1%)   |
| Other                                   | 54 (2.6%)    |

1  
2  
3  
4  
5  
6  
7  
8  
9  
10  
11  
12  
13  
14  
15  
16  
17  
18  
19  
20  
21  
22  
23  
24  
25  
26  
27  
28  
29  
30  
31  
32  
33  
34  
35  
36  
37  
38  
39  
40  
41  
42  
43  
44  
45  
46  
47  
48  
49  
50  
51  
52  
53  
54  
55  
56  
57  
58  
59  
60**Table 2.** Patients' use of e-consultation and other digital health services with the GP.

|                                                   |              |
|---------------------------------------------------|--------------|
| Access to services, n (%)                         |              |
| electronic booking of appointments                | 1356 (66.4%) |
| electronic prescription renewal                   | 1109 (54.3%) |
| electronic contact with the GP office             | 528 (25.8%)  |
| e-consultation                                    | 762 (37.3%)  |
| Number of services accessed by respondents, n (%) |              |
| 1                                                 | 982 (48.1%)  |
| 2                                                 | 566 (27.7%)  |
| 3                                                 | 339 (16.6%)  |
| 4                                                 | 156 (7.6%)   |
| Use of electronic booking of appointments, n (%)  |              |
| GP's calendar                                     | 793 (58.5%)  |
| electronic inquiry                                | 294 (21.7%)  |
| both                                              | 269 (19.8%)  |

**Table 3.** Most commonly occurring responses and selected anecdotal statements the for the four e-health services.

|                                                                      |                                                                      |
|----------------------------------------------------------------------|----------------------------------------------------------------------|
| <b>Electronic booking of appointments</b>                            |                                                                      |
| <i>Common responses</i>                                              | <i>Selected anecdotal responses</i>                                  |
| Want to be able to book urgent appointments                          | The availability of bookable slots is poor                           |
| Want the possibility to book appointment for own children            | Want the possibility to cancel appointments                          |
| Want to be able to attach a comment to the appointment enquiry       | Want a mobile application with push notifications                    |
| <b>Electronic prescription renewal</b>                               |                                                                      |
| <i>Common responses</i>                                              | <i>Selected anecdotal responses</i>                                  |
| Want a receipt that the enquiry is sent and estimated time to answer | Hard to spell the medical names correctly                            |
| Want a list of expired prescriptions with a "renew" button           | Risk to mix up prescriptions (e.g. melting tablets, debot tablets)   |
| Want the possibility to manage own children's prescriptions          | Poor readability when lists are long and complicated                 |
| <b>Electronic contact with the GP office</b>                         |                                                                      |
| <i>Common responses</i>                                              | <i>Selected anecdotal responses</i>                                  |
| Want a receipt that the message is read                              | Easier to call by phone than to write                                |
| Service can be confused with e-consultation                          | Uncertain about who reads the message                                |
| Service not easy to navigate                                         | Want to send a message on behalf of own children                     |
| <b>E-consultation</b>                                                |                                                                      |
| <i>Common responses</i>                                              | <i>Selected anecdotal responses</i>                                  |
| Unreasonable that out-of-pocket payment is charged                   | Want a receipt that the message is read and estimated time to answer |
| The present limit of 1,000 characters for messages is too short      | Want the possibility to write on behalf of own children              |
| Want an autosave function so that the text is not lost while writing | Written communication is not suited for clinical contact             |

## Figures

**Figure 1.** GP offices adopting the “Digital dialogue with the general practitioner”.

**Figure 2.** Patients’ experiences, perceived benefits and satisfaction with the four e-health services.

For peer review only

## Supplementary files

**Supplementary file 1.** Distribution (%) of users of digital health services with the GP by gender and age groups.

**Supplementary file 2.** Distribution (%) of face-to-face consultations with the GP by gender and age groups.

**Supplementary file 3.** Distribution (%) of the general population by gender and age groups.

For peer review only

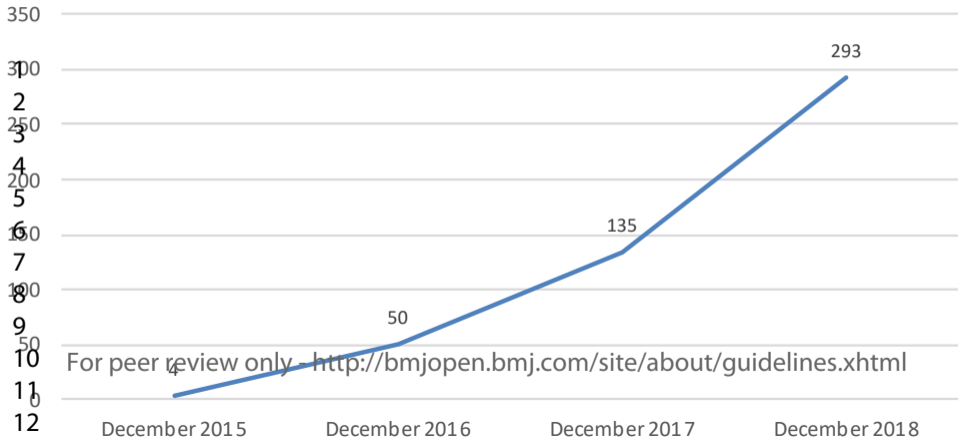

### Electronic booking of appointments

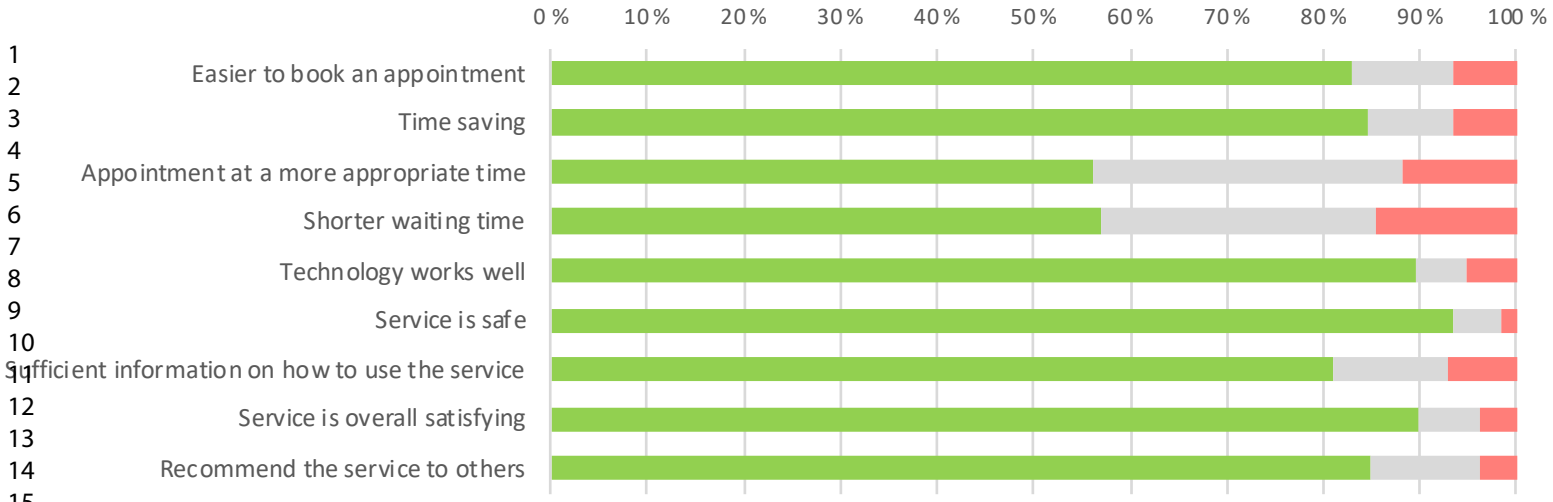

### Electronic prescription renewal

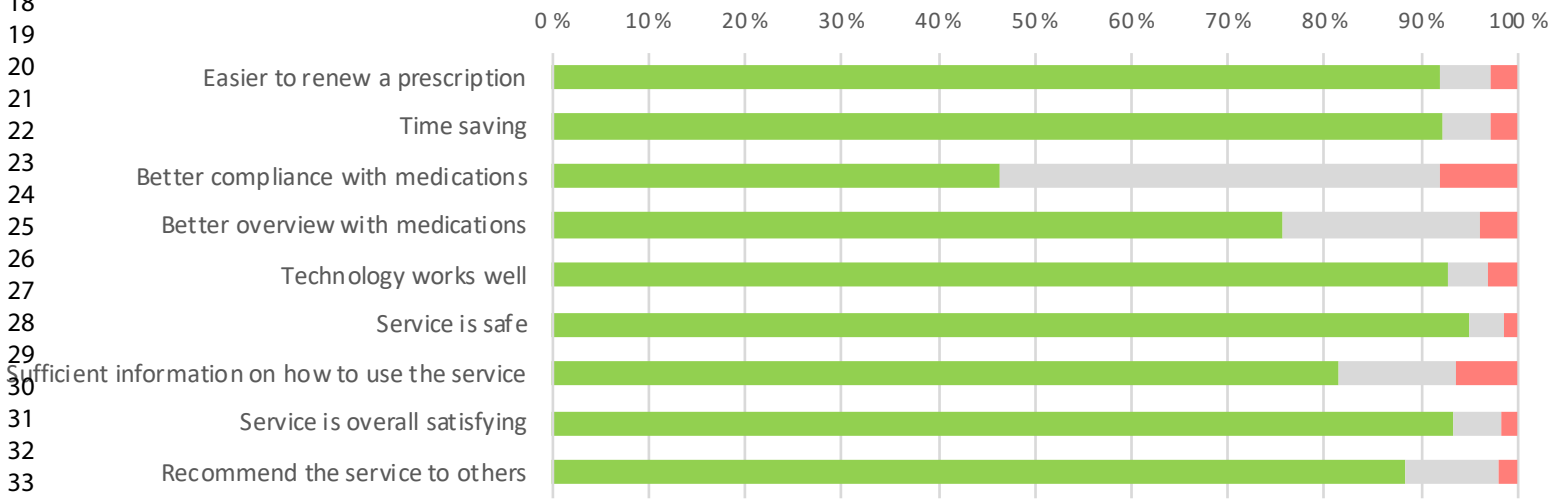

### Electronic contact with the GP office

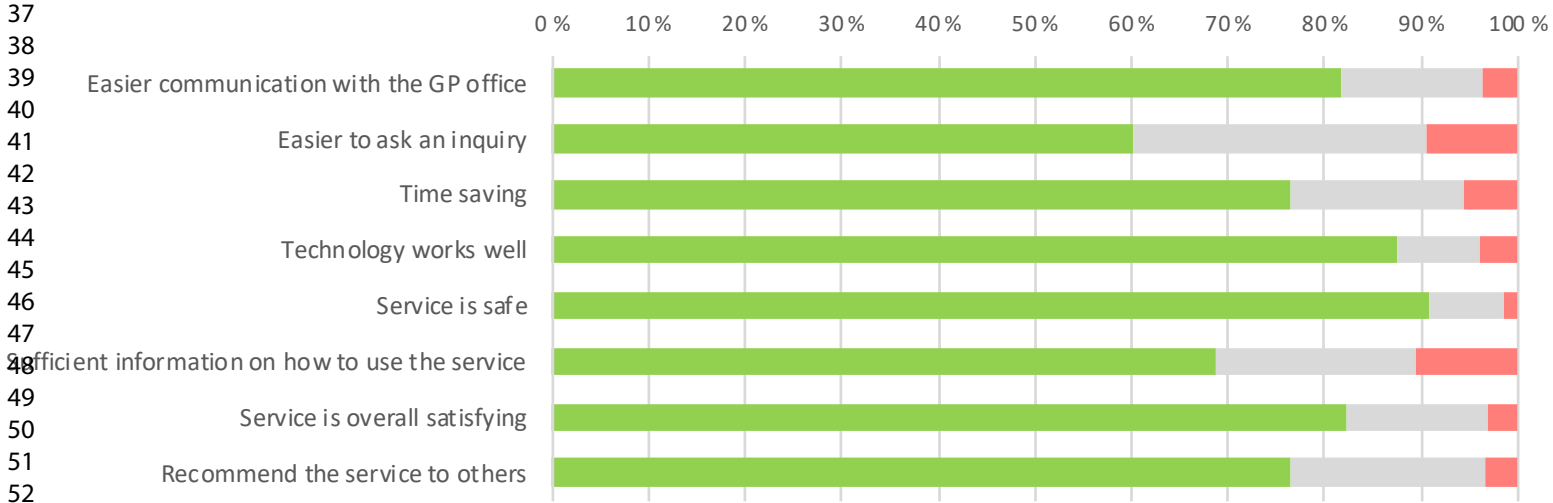

### E-consultation

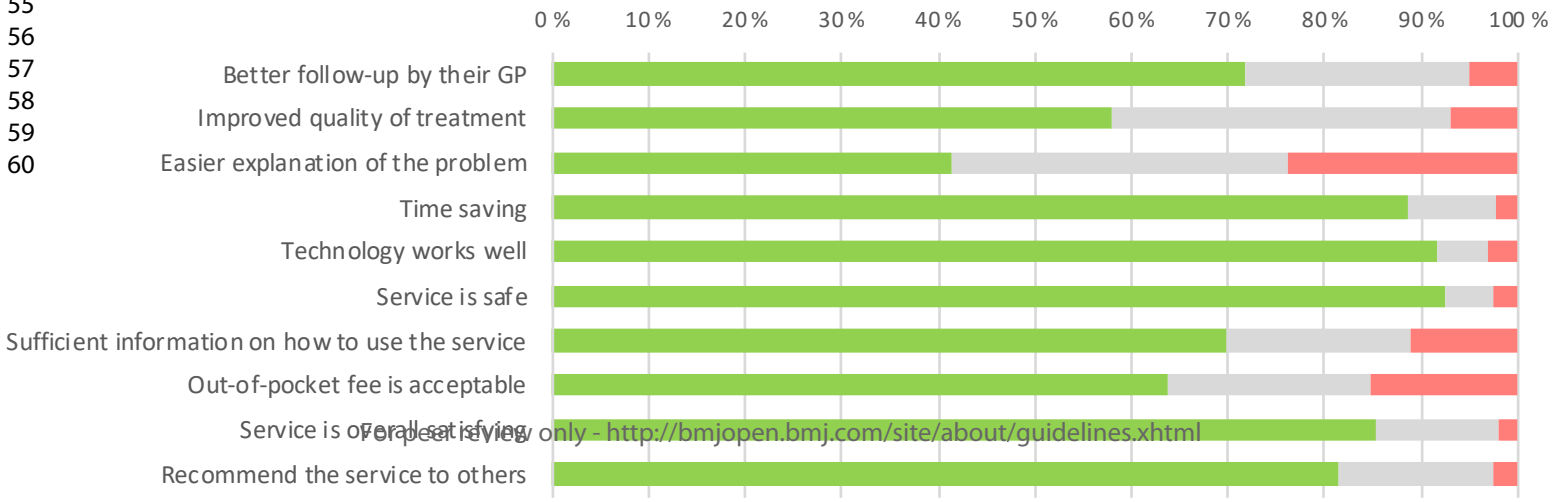

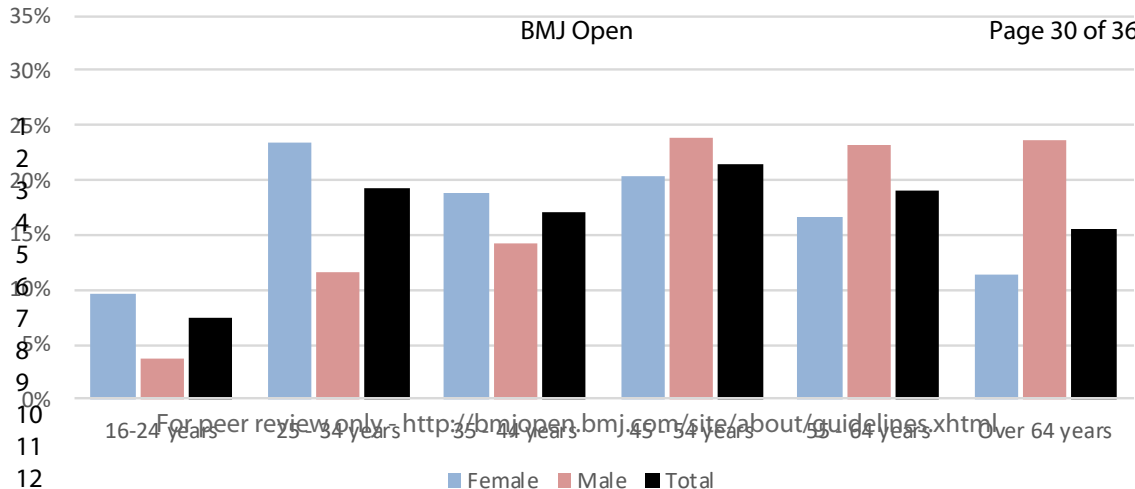

For peer review only - <http://bmjopen.bmj.com/site/about/guidelines.xhtml>

Female Male Total



### BMJ Open

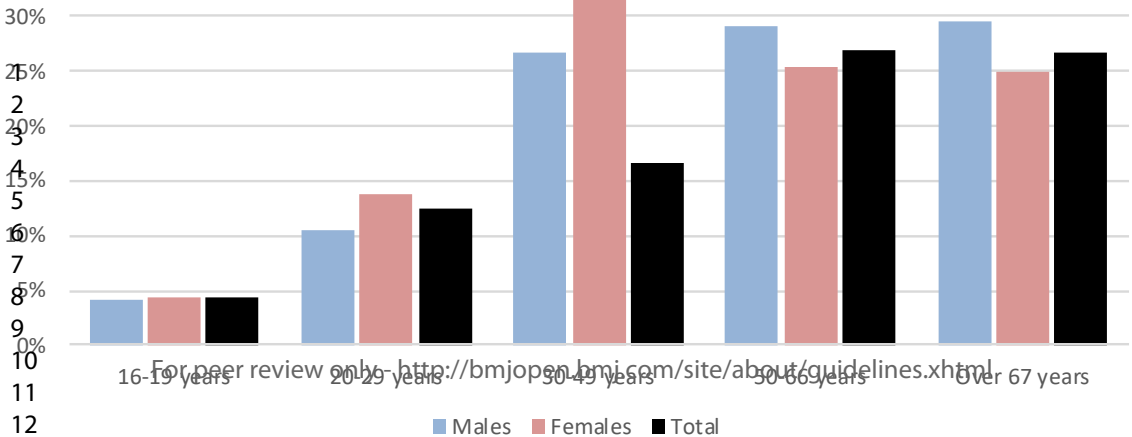

For peer review only - <http://bmjopen.bmj.com/site/about/guidelines.xhtml>

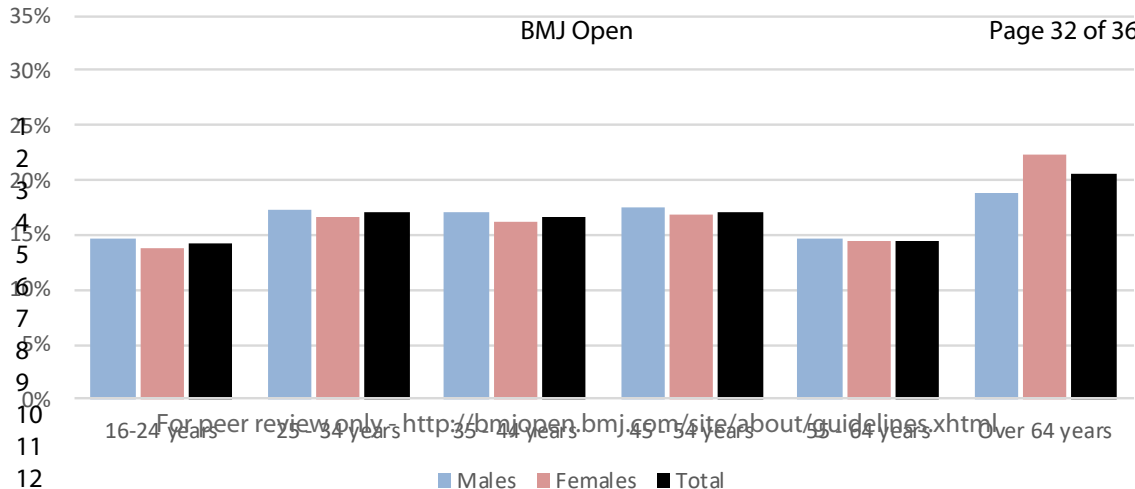

For peer review only. <http://bmjopen.bmj.com/site/about/guidelines.xhtml>

## Checklist for Reporting Results of Internet E-Surveys (CHERRIES)

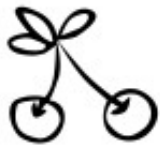
**Checklist for Reporting Results of Internet E-Surveys  
(CHERRIES)**

| <i>Item Category</i>                                                                        | <i>Checklist Item</i>            | <i>Explanation</i>                                                                                                                                                                                                   |
|---------------------------------------------------------------------------------------------|----------------------------------|----------------------------------------------------------------------------------------------------------------------------------------------------------------------------------------------------------------------|
| <b>Design</b>                                                                               | Describe survey design           | Describe target population, sample frame. Is the sample a convenience sample? (In “open” surveys this is most likely.)                                                                                               |
| <b>IRB (Institutional Review Board) approval and informed consent process</b>               | IRB approval                     | Mention whether the study has been approved by an IRB.                                                                                                                                                               |
|                                                                                             | Informed consent                 | Describe the informed consent process. Where were the participants told the length of time of the survey, which data were stored and where and for how long, who the investigator was, and the purpose of the study? |
|                                                                                             | Data protection                  | If any personal information was collected or stored, describe what mechanisms were used to protect unauthorized access.                                                                                              |
| <b>Development and pre-testing</b>                                                          | Development and testing          | State how the survey was developed, including whether the usability and technical functionality of the electronic questionnaire had been tested before fielding the questionnaire.                                   |
| <b>Recruitment process and description of the sample having access to the questionnaire</b> | Open survey versus closed survey | An “open survey” is a survey open for each visitor of a site, while a closed survey is only open to a sample which the investigator knows (password-protected survey).                                               |

|                                          |                                                                                                                                                                                                                                                                                                                                                                                                                                              |
|------------------------------------------|----------------------------------------------------------------------------------------------------------------------------------------------------------------------------------------------------------------------------------------------------------------------------------------------------------------------------------------------------------------------------------------------------------------------------------------------|
| Contact mode                             | Indicate whether or not the initial contact with the potential participants was made on the Internet. (Investigators may also send out questionnaires by mail and allow for Web-based data entry.)                                                                                                                                                                                                                                           |
| Advertising the survey                   | How/where was the survey announced or advertised? Some examples are offline media (newspapers), or online (mailing lists – If yes, which ones?) or banner ads (Where were these banner ads posted and what did they look like?). It is important to know the wording of the announcement as it will heavily influence who chooses to participate. Ideally the survey announcement should be published as an appendix.                        |
| Web/E-mail                               | State the type of e-survey (eg, one posted on a Web site, or one sent out through e-mail). If it is an e-mail survey, were the responses entered manually into a database, or was there an automatic method for capturing responses?                                                                                                                                                                                                         |
| Context                                  | Describe the Web site (for mailing list/newsgroup) in which the survey was posted. What is the Web site about, who is visiting it, what are visitors normally looking for? Discuss to what degree the content of the Web site could pre-select the sample or influence the results. For example, a survey about vaccination on a anti-immunization Web site will have different results from a Web survey conducted on a government Web site |
| Mandatory/voluntary                      | Was it a mandatory survey to be filled in by every visitor who wanted to enter the Web site, or was it a voluntary survey?                                                                                                                                                                                                                                                                                                                   |
| Incentives                               | Were any incentives offered (eg, monetary, prizes, or non-monetary incentives such as an offer to provide the survey results)?                                                                                                                                                                                                                                                                                                               |
| Time/Date                                | In what timeframe were the data collected?                                                                                                                                                                                                                                                                                                                                                                                                   |
| Randomization of items or questionnaires | To prevent biases items can be randomized or alternated.                                                                                                                                                                                                                                                                                                                                                                                     |
| Adaptive questioning                     | Use adaptive questioning (certain items, or only conditionally displayed based on responses to other items) to reduce number and complexity of the questions.                                                                                                                                                                                                                                                                                |

1  
2  
3  
4  
5  
6  
7  
8  
9  
10  
11  
12  
13  
14  
15  
16  
17  
18 **Survey**  
19 **administration**  
20

|    |                    |                                                                                                                          |
|----|--------------------|--------------------------------------------------------------------------------------------------------------------------|
| 1  | Number of Items    | What was the number of questionnaire items per page? The number of items is an important factor for the completion rate. |
| 2  |                    |                                                                                                                          |
| 3  | Number of screens  | Over how many pages was the questionnaire distributed? The number of items is an                                         |
| 4  | (pages)            | important factor for the completion rate.                                                                                |
| 5  |                    |                                                                                                                          |
| 6  | Completeness check | It is technically possible to do consistency or                                                                          |
| 7  |                    | completeness checks before the                                                                                           |
| 8  |                    | questionnaire is submitted. Was this done,                                                                               |
| 9  |                    | and if “yes”, how (usually JavaScript)? An                                                                               |
| 10 |                    | alternative is to check for completeness after                                                                           |
| 11 |                    | the questionnaire has been submitted (and                                                                                |
| 12 |                    | highlight mandatory items). If this has been                                                                             |
| 13 |                    | done, it should be reported. All items should                                                                            |
| 14 |                    | provide a non-response option such as “not                                                                               |
| 15 |                    | applicable” or “rather not say”, and selection                                                                           |
| 16 |                    | of one response option should be enforced.                                                                               |
| 17 |                    |                                                                                                                          |
| 18 | Review step        | State whether respondents were able to                                                                                   |
| 19 |                    | review and change their answers (eg,                                                                                     |
| 20 |                    | through a Back button or a Review step                                                                                   |
| 21 |                    | which displays a summary of the responses                                                                                |
| 22 |                    | and asks the respondents if they are correct).                                                                           |
| 23 |                    |                                                                                                                          |
| 24 |                    |                                                                                                                          |
| 25 |                    |                                                                                                                          |
| 26 |                    |                                                                                                                          |
| 27 |                    |                                                                                                                          |

## Response rates

|    |                          |                                                 |
|----|--------------------------|-------------------------------------------------|
| 28 |                          |                                                 |
| 29 | Unique site visitor      | If you provide view rates or participation      |
| 30 |                          | rates, you need to define how you               |
| 31 |                          | determined a unique visitor. There are          |
| 32 |                          | different techniques available, based on IP     |
| 33 |                          | addresses or cookies or both.                   |
| 34 |                          |                                                 |
| 35 | View rate (Ratio of      | Requires counting unique visitors to the first  |
| 36 | unique survey            | page of the survey, divided by the number of    |
| 37 | visitors/unique site     | unique site visitors (not page views!). It is   |
| 38 | visitors)                | not unusual to have view rates of less than     |
| 39 |                          | 0.1 % if the survey is voluntary.               |
| 40 |                          |                                                 |
| 41 | Participation rate       | Count the unique number of people who           |
| 42 | (Ratio of unique         | filled in the first survey page (or agreed to   |
| 43 | visitors who agreed to   | participate, for example by checking a          |
| 44 | participate/unique first | checkbox), divided by visitors who visit the    |
| 45 | survey page visitors)    | first page of the survey (or the informed       |
| 46 |                          | consents page, if present). This can also be    |
| 47 |                          | called “recruitment” rate.                      |
| 48 |                          |                                                 |
| 49 | Completion rate          | The number of people submitting the last        |
| 50 | (Ratio of users who      | questionnaire page, divided by the number of    |
| 51 | finished the             | people who agreed to participate (or            |
| 52 | survey/users who         | submitted the first survey page). This is only  |
| 53 | agreed to participate)   | relevant if there is a separate “informed       |
| 54 |                          | consent” page or if the survey goes over        |
| 55 |                          | several pages. This is a measure for attrition. |
| 56 |                          | Note that “completion” can involve leaving      |
| 57 |                          | questionnaire items blank. This is not a        |
| 58 |                          |                                                 |
| 59 |                          |                                                 |
| 60 |                          |                                                 |

BMJ Open  
measure for how completely questionnaires were filled in. (If you need a measure for this, use the word “completeness rate”.)

1  
2  
3 **Preventing multiple**  
4 **entries from the**  
5 **same individual**  
6

7 Cookies used

8 Indicate whether cookies were used to assign  
9 a unique user identifier to each client  
10 computer. If so, mention the page on which  
11 the cookie was set and read, and how long  
12 the cookie was valid. Were duplicate entries  
13 avoided by preventing users access to the  
14 survey twice; or were duplicate database  
15 entries having the same user ID eliminated  
16 before analysis? In the latter case, which  
17 entries were kept for analysis (eg, the first  
18 entry or the most recent)?  
19

20  
21 IP check

22 Indicate whether the IP address of the client  
23 computer was used to identify potential  
24 duplicate entries from the same user. If so,  
25 mention the period of time for which no two  
26 entries from the same IP address were  
27 allowed (eg, 24 hours). Were duplicate  
28 entries avoided by preventing users with the  
29 same IP address access to the survey twice;  
30 or were duplicate database entries having the  
31 same IP address within a given period of  
32 time eliminated before analysis? If the latter,  
33 which entries were kept for analysis (eg, the  
34 first entry or the most recent)?  
35

36  
37 Log file analysis

38 Indicate whether other techniques to analyze  
39 the log file for identification of multiple  
40 entries were used. If so, please describe.

41 Registration

42 In “closed” (non-open) surveys, users need  
43 to login first and it is easier to prevent  
44 duplicate entries from the same user.  
45 Describe how this was done. For example,  
46 was the survey never displayed a second  
47 time once the user had filled it in, or was the  
48 username stored together with the survey  
49 results and later eliminated? If the latter,  
50 which entries were kept for analysis (eg, the  
51 first entry or the most recent)?  
52

53  
54 **Analysis**  
55

56 Handling of  
57 incomplete  
58 questionnaires

59 Were only completed questionnaires  
60 analyzed? Were questionnaires which  
terminated early (where, for example, users  
did not go through all questionnaire pages)  
also analyzed?

Questionnaires submitted with an atypical timestamp

BMJ Open

Some investigators may measure the time people needed to fill in a questionnaire and exclude questionnaires that were submitted too soon. Specify the timeframe that was used as a cut-off point, and describe how this point was determined.

Statistical correction

Indicate whether any methods such as weighting of items or propensity scores have been used to adjust for the non-representative sample; if so, please describe the methods.

For peer review only

1  
2  
3  
4  
5  
6  
7  
8  
9  
10  
11  
12  
13  
14  
15  
16  
17  
18  
19  
20  
21  
22  
23  
24  
25  
26  
27  
28  
29  
30  
31  
32  
33  
34  
35  
36  
37  
38  
39  
40  
41  
42  
43  
44  
45  
46  
47  
48  
49  
50  
51  
52  
53  
54  
55  
56  
57  
58  
59  
60

# BMJ Open

## Patients' use and experiences with e-consultation and other digital health services with their general practitioner in Norway: results from an online survey

|                                 |                                                                                                                                                                                                                                                                                                        |
|---------------------------------|--------------------------------------------------------------------------------------------------------------------------------------------------------------------------------------------------------------------------------------------------------------------------------------------------------|
| Journal:                        | <i>BMJ Open</i>                                                                                                                                                                                                                                                                                        |
| Manuscript ID                   | bmjopen-2019-034773.R1                                                                                                                                                                                                                                                                                 |
| Article Type:                   | Original research                                                                                                                                                                                                                                                                                      |
| Date Submitted by the Author:   | 09-Mar-2020                                                                                                                                                                                                                                                                                            |
| Complete List of Authors:       | Zanaboni, Paolo; University Hospital of North Norway, Norwegian Centre for E-health Research; UiT The Arctic University of Norway Faculty of Health Sciences, Department of Clinical Medicine Fagerlund, Asbjørn Johansen; University Hospital of North Norway, Norwegian Centre for E-health Research |
| <b>Primary Subject Heading</b>: | General practice / Family practice                                                                                                                                                                                                                                                                     |
| Secondary Subject Heading:      | Health informatics, Health services research                                                                                                                                                                                                                                                           |
| Keywords:                       | Telemedicine < BIOTECHNOLOGY & BIOINFORMATICS, Information technology < BIOTECHNOLOGY & BIOINFORMATICS, Health informatics < BIOTECHNOLOGY & BIOINFORMATICS, GENERAL MEDICINE (see Internal Medicine)                                                                                                  |
|                                 |                                                                                                                                                                                                                                                                                                        |

SCHOLARONE™  
Manuscripts





I, the Submitting Author has the right to grant and does grant on behalf of all authors of the Work (as defined in the below author licence), an exclusive licence and/or a non-exclusive licence for contributions from authors who are: i) UK Crown employees; ii) where BMJ has agreed a CC-BY licence shall apply, and/or iii) in accordance with the terms applicable for US Federal Government officers or employees acting as part of their official duties; on a worldwide, perpetual, irrevocable, royalty-free basis to BMJ Publishing Group Ltd ("BMJ") its licensees and where the relevant Journal is co-owned by BMJ to the co-owners of the Journal, to publish the Work in this journal and any other BMJ products and to exploit all rights, as set out in our [licence](#).

The Submitting Author accepts and understands that any supply made under these terms is made by BMJ to the Submitting Author unless you are acting as an employee on behalf of your employer or a postgraduate student of an affiliated institution which is paying any applicable article publishing charge ("APC") for Open Access articles. Where the Submitting Author wishes to make the Work available on an Open Access basis (and intends to pay the relevant APC), the terms of reuse of such Open Access shall be governed by a Creative Commons licence – details of these licences and which [Creative Commons](#) licence will apply to this Work are set out in our licence referred to above.

Other than as permitted in any relevant BMJ Author's Self Archiving Policies, I confirm this Work has not been accepted for publication elsewhere, is not being considered for publication elsewhere and does not duplicate material already published. I confirm all authors consent to publication of this Work and authorise the granting of this licence.

# 1 Patients' use and experiences with e-consultation and 2 other digital health services with their general 3 practitioner in Norway: results from an online survey

4  
5 **Paolo Zanaboni**<sup>1,2</sup>: paolo.zanaboni@ehealthresearch.no

6 **Asbjørn Johansen Fagerlund**<sup>1</sup>: asbjorn.johansen.fagerlund@ehealthresearch.no

7  
8 <sup>1</sup> Norwegian Centre for E-health Research, University Hospital of North Norway, Tromsø, Norway

9 <sup>2</sup> Department of Clinical Medicine, Faculty of Health Sciences, UiT The Arctic University of Norway, Tromsø, Norway

## 10 11 **Corresponding author**

12 Paolo Zanaboni

13 Address: Norwegian Center for E-health Research, University Hospital of North Norway, P.O. Box  
14 35, 9038 Tromsø, Norway

15 Email: paolo.zanaboni@ehealthresearch.no

## 16 17 **ABSTRACT**

18 **Objectives:** To explore patients' use and experiences with four digital health services implemented  
19 in Norway to enable electronic communication between patients and their GP: (1) electronic booking  
20 of appointments; (2) electronic prescription renewal; (3) electronic contact with the GP office for  
21 non-clinical inquiries; (4) e-consultation for clinical inquiries.

22 **Design:** An online survey consisting of quantitative data supplemented by qualitative information  
23 was conducted to explore: (1) characteristics of the users; (2) use; (3) experiences, perceived benefits  
24 and satisfaction; (4) time spent using the digital health services.

25 **Setting:** Primary care.

26 **Participants:** 2,043 users of the digital health services answering the survey.

27 **Results:** There was a higher proportion of women, younger adults, and digitally active citizens with  
28 high education. Electronic booking of appointments was the most used service (66.4%), followed by  
29 electronic prescription renewal (54.3%). Most users (80%) could more easily and efficiently book an  
30 appointment electronically than by phone. Over 90% of the respondents thought that it was easier to  
31 renew a prescription electronically, 76% obtained a better overview of their medications and 46%  
32 reported higher compliance. For non-clinical inquiries, most respondents (60%) thought that it was  
33 easier to write electronic messages than communicate by phone. For clinical enquiries, many patients  
34 agreed that e-consultation could lead to a better follow-up (72%) and improved quality of treatment  
35 (58%). Users were highly satisfied with the services and recommended their use to others. Time

1  
2 1 saving was the most evident benefit for patients. This was confirmed by the differences in time spent  
3  
4 2 using the digital health services compared to conventional approaches, all found to be statistically  
5  
6 3 significant.

7 4 **Conclusions:** Citizens using e-consultation and other digital health services with their GP in Norway  
8  
9 5 are satisfied and consider them as useful and efficient alternatives to conventional approaches.

10  
11 6

## 12 7 **ARTICLE SUMMARY**

### 14 8 **Strengths and limitations of this study**

- 16 9 • One of the first examples of nationwide implementation of digital health services for citizens in  
17 10 primary care
  - 19 11 • The quantitative survey was supplemented by qualitative feedbacks with interesting insights and  
20 12 useful suggestions for improvement
  - 23 13 • High number of respondents considered to be representative of those who used the services
  - 25 14 • Respondents were early adopters who could be have a more positive attitude
  - 26 15 • Findings are relevant to citizens, general practitioners and policy-makers
- 28  
29  
30  
31  
32  
33  
34  
35  
36  
37  
38  
39  
40  
41  
42  
43  
44  
45  
46  
47  
48  
49  
50  
51  
52  
53  
54  
55  
56  
57  
58  
59  
60

## 1 **Background**

2 The increasing demand in primary care within a limited capacity and the need to improve patients'  
3 access has prompted the consideration of alternatives to face-to-face contacts with the General  
4 Practitioner (GP), including telephone contacts as well as electronic communication, such as email,  
5 electronic messaging via patient portals, or Internet video [1,2]. Electronic communication between  
6 patients and physicians has the potential to empower patients [3] and improve health care services  
7 [4]. There is also growing recognition that many patient encounters do not require face-to-face  
8 contact, and the increasing use of the Internet creates the opportunity for remote consultations, where  
9 the interaction between physician and patient is completely virtual [5].

10 In the early 2000s, a number of studies on e-mail communication between patients and GP were  
11 conducted. Patients found e-mail communication easy to use [6,7] and preferred it over phone calls  
12 for the communication of non-urgent problems [6,8,9], including updates to the GP, prescription  
13 renewals, health questions, questions about test results or referrals, appointments, and requests for  
14 non-health-related information [8,9,10]. However, the empirical evidence for the use of email for  
15 clinical communication between patients and healthcare professionals [11] and for the provision of  
16 information on disease prevention and health promotion [12] remains limited. Despite email being  
17 commonly offered by GP offices for making appointments and renewing prescriptions, its use for  
18 direct contact with the GP is not commonplace [13]. In a retrospective observational study, even  
19 though email consultation was adopted by half of the general practices in the Netherlands in 2014, its  
20 actual use was extremely low [14]. Moreover, the security level for regular email is considered  
21 insufficient [4] and non-compliant to current requirements for authentication and encryption [15].

22 Today, the electronic communication between patients and GP is generally done in an asynchronous  
23 manner via a secure electronic patient portal [5,16,17]. Web messaging systems address issues around  
24 security and liability associated with conventional email communication since they offer encryption  
25 capability and access controls [6,13]. The GP Online is a national programme introduced in the UK

1  
2 1 in 2016 to offer online services to primary care patients in addition to the traditional telephone and  
3  
4 2 face-to-face means of interacting with a GP practice [18]. Patients can access online services through  
5  
6 3 patient portals, enabling them to book and manage appointments, order repeat prescriptions and view  
7  
8 4 their GP medical records [19]. In 2019, the NHS app was introduced to contrast the slow progress in  
9  
10 5 widescale adoption of these services and provide a better solution to patients [20]. Through the NHS  
11  
12 6 app, citizens can now identify themselves through the national Citizen Identity tool and use additional  
13  
14 7 facilities including a symptom checker and access to donor information [20]. Some private providers  
15  
16 8 are also offering access to GP consultations via mobile or online triage platforms, including  
17  
18 9 askmyGP, eConsult and Egton Online Triage [20,21]. Such forms of electronic communication have  
19  
20 10 been considered by patients as equivalent or better than face-to-face contacts [22] and represent an  
21  
22 11 appropriate and potentially cost-saving addition to in-person delivery of primary care [22,23].  
23  
24 12 Patients also experienced easier access to their GP for minor health problems, and received quick  
25  
26 13 responses to their requests [4]. A recent evaluation of an online consultation system tested in 36  
27  
28 14 general practices in South West England found that the use of online consultations was very low (2  
29  
30 15 per 1,000 patients per month), more common among women and working-age adults, and mostly  
31  
32 16 suitable for administrative requests, such as repeat prescriptions and test results [24]. According to  
33  
34 17 the recent NHS long term plan, all patients in England is expected to have access to online GP  
35  
36 18 consultations by 2023-24 [25].

37  
38 19 Electronic communication between patients and GP can also be conducted through real-time video  
39  
40 20 linkage [5]. Benefits of video communication in primary care compared to in-person encounters  
41  
42 21 include convenience, efficiency, communication, privacy, and comfort [26]. In 2014, the UK  
43  
44 22 government made a commitment to spend £3.6 million on the introduction of Skype video calling  
45  
46 23 consultations in general practice [27]. Evidence of the use and effects of video communication in  
47  
48 24 primary care is still scarce. Preliminary studies aimed at exploring the attitudes of GPs towards video  
49  
50 25 consultations in Australia and UK concluded that the majority of the GPs recognized potential  
51  
52 26 benefits but also expressed concerns [27,28].

## Digital dialogue with the general practitioner in Norway

The «Digital dialogue with the general practitioner» implemented in Norway is a suite of four e-health services which enable secure communication between patients and their GP over the Internet.

The four digital services include: (1) an electronic booking service to make appointments with the GP; (2) an electronic prescription service to request renewal of maintenance drugs, with direct integration with the electronic prescription system of pharmacies; (3) a service for electronic contact with the GP office for text-based non-clinical inquiries (e.g. opening hours, results from diagnostic tests) as an alternative to phone calling; (4) a service for electronic consultation (e-consultation) with the GP for clinical inquiries. The distinction between e-consultation and electronic contact is that an e-consultation must include a medical evaluation equivalent to a face-to-face consultation [5].

The four services were introduced simultaneously in September 2014 and tested by selected GP offices. Following a pilot stage, the «Digital dialogue with the general practitioner» was implemented nationwide in 2016. Its use by GPs is not mandatory. By December 2019, these services were offered via the national health portal helsenorge.no by a total 386 GP offices (out of 1,542 offices) which volunteered as early adopters [Figure 1]. These services are accessible to residents in Norway aged 16 years or older from the private section of the national portal helsenorge.no available after login. The national health portal was established in 2011 to provide health information and accommodate digital health services gathered in one place [29]. Secure access is obtained through a unique identification and authentication procedure via a national ID portal with Security Level 4 (the same authentication procedure used for Internet-banking). All the four services are integrated with the GP's electronic patient record (EPR) system. GPs who adhere to this national initiative and offer these services to their patients are able to receive and send sensitive information and communicate digitally via their own EPR system, and the information exchange is documented in the journal. The services can be activated and deactivated by each GP. This makes it possible to use only some of the four services. The services are supported by the Norwegian Health Network and the EPR suppliers.

1  
2 1 The presented suite of e-health services between patient and GP has the potential to improve the  
3  
4 2 accessibility, quality and efficiency of primary health care. According to the Norwegian Directorate  
5  
6 3 of Health, e-consultation and other digital health services with the GP might result in a number of  
7  
8 4 possible benefits for patients including: digital communication with their GP which ensures  
9  
10 5 confidentiality, information security and privacy; time savings (work, travel, waiting); faster  
11  
12 6 detection or treatment of serious diagnoses; possibility to contact their GP at any time, even when on  
13  
14 7 holiday; easier formulation of a request for health assistance or practical inquiry by written message  
15  
16 8 than by oral communication [30]. Despite these expected benefits, there is limited research-based  
17  
18 9 knowledge of the effects of the implementation of the «Digital dialogue with the general practitioner»  
19  
20 10 in Norway. Governments and vendors have been criticized for being overly optimistic about the  
21  
22 11 expected favorable outcomes from employing digital health services [31], and the realization of these  
23  
24 12 benefits has often been slower than anticipated [32]. There is a strong need for those undertaking the  
25  
26 13 implementation of e-health to understand factors that affect implementation [32]. However, to date,  
27  
28 14 only few studies have been performed on large-scale implementation of digital health services for  
29  
30 15 citizens in primary care.

## 36 16 **Study aim**

37 17 The aim of the present study was to explore patients' use and experiences with e-consultation and  
38  
39 18 other digital health services with their GP implemented in Norway. A survey consisting of  
40  
41 19 quantitative data supplemented by qualitative information was conducted to explore: (1) the  
42  
43 20 characteristics of the users; (2) the use of e-consultation and other digital health services with the GP;  
44  
45 21 (3) experiences, perceived benefits and satisfaction with e-consultation and other digital health  
46  
47 22 services with the GP; and (4) time spent using e-consultation and other digital health services with  
48  
49 23 the GP compared to conventional methods (e.g. phone, office visit).

## 56 24 57 58 25 **Methods**

## 1 **Description of the digital health services**

2 The «Digital dialogue with the general practitioner» is a suite of four e-health services which enable  
3 secure communication between patients and their GPs over the Internet.

### 4 ***Electronic booking of appointments***

5 The service includes two possible options for electronic booking of appointments. The GP can make  
6 time slots available for electronic booking via helsenorge.no. The patient can choose among the time  
7 slots available in their GP's calendar and book an appointment directly through the  
8 service. Alternatively, the patient can to send an electronic inquiry for an appointment with a text-  
9 based message via the system without selecting a specific time slot. In this case, the GP office will  
10 find a free time slot. This can be useful to book an appointment for children or other relatives who  
11 are not digitally active. Once the patient has been assigned an appointment, the system sends out a  
12 confirmation via SMS. The text message does not contain sensitive information. Each GP can decide  
13 which times slots are made available for electronic booking. The GP can also decide which of the  
14 two alternatives to offer to their patients. Normally, appointments can be made available four to five  
15 weeks in advance.

### 16 ***Electronic prescription renewal***

17 Patients can send a message to their GP and ask for a prescription renewal of maintenance  
18 medications or medical equipment. The prescription service available via helsenorge.no provides an  
19 overview of all prescriptions and which of them are active. The GP office receives a message from  
20 the patient into the EPR system containing which prescriptions the patient wishes to renew. It is  
21 possible to ask for renewal of multiple prescriptions within one request. GP offices have established  
22 routines for which types of medications can be renewed without a face-to-face consultation (e.g. by  
23 phone), and this also applies to the electronic prescription renewal service. The doctor who approves  
24 an electronic prescription renewal must make an individual medical assessment of the validity of the  
25 prescription. The most common routine today is to allow prescription renewals without a face-to-face



1  
2 1 consultation when maintenance medications must be renewed before the patient is due for control  
3  
4 2 (with the exception of certain addictive prescription medications). The inquiry for an electronic  
5  
6 3 prescription renewal contains a free text field with the description of which medications the patient  
7  
8 4 wishes to renew (name, dosage form, dosage) and an additional comment field. The GP can accept  
9  
10  
11 5 or reject the request. In both cases, a confirmation is sent to the patient.  
12

### 13 14 6 ***Electronic contact with the GP office***

15  
16  
17 7 This service provides patients with a secure communication channel with the GP office. The service  
18  
19 8 can be used for text-based non-clinical inquiries (e.g. opening hours, results from diagnostic tests) as  
20  
21 9 an alternative to a phone call to the reception at the GP office. The service can also be utilized to send  
22  
23 10 mail digitally to the patient and can include attachments (PDF, JPG or PNG). The questions are  
24  
25 11 normally answered by the reception at the GP office. The service is not intended for providing health  
26  
27 12 assistance. Examples where the electronic contact with the GP office can be used include: booking  
28  
29 13 and confirmation (time, location) of patient transport otherwise done by phone; practical short  
30  
31 14 questions (e.g. holidays); practical questions before an appointment or clinical examination. Health  
32  
33 15 personnel can also initiate an electronic dialogue with the patient if the patient is digitally active  
34  
35 16 (marked in the EPR system). The service is free of charge for the patient. In case a patient should  
36  
37 17 improperly ask for health assistance via this service, the GP office will ask the patient to initiate an  
38  
39 18 e-consultation instead.  
40  
41  
42  
43  
44

### 45 19 ***E-consultation***

46  
47  
48 20 The e-consultation service evaluated in the current study is an online text-based clinical consultation  
49  
50 21 with the GP conducted as alternative to a face-to-face appointment. Patients pay the same out-of-  
51  
52 22 pocket fee as for office visits (NOK 155, approximately € 15, in 2018). To date, this service only  
53  
54 23 applies to known health conditions, and only when physical attendance is not required. Patients need  
55  
56 24 to book a regular appointment if new symptoms or health problems occurs. The service cannot be  
57  
58 25 used for immediate assistance or emergency situations. Information on what e-consultation is suitable  
59  
60 26 for is provided on the national health portal. Examples of situations where e-consultation can be used

1 safely include: follow-up of patients with chronic health conditions (e.g. worsening during treatment);  
2 follow-up questions about use of medications (e.g. compliance, side effects, lack of effect); follow-  
3 up of mild mental disorders (e.g. events that aggravate anxiety); requests for certificates and  
4 statements which do not require re-examination; use of the written documentation from the e-  
5 consultation for referral to a specialist. Examples where use of e-consultation is not recommended  
6 include: provision of sick leave certificates; assessment of acute exacerbations; occurrence of new  
7 health problems which require a new examination (e.g. severe side effects after starting with a new  
8 medication); assessment of exacerbations requiring clinical examination (e.g. bothersome rashes and  
9 wounds, psychiatric issues which require a dialogue); complex issues which require extensive  
10 measures (e.g. worsening of chronic illness with need to review medications in case of  
11 multimorbidity); issues unsuccessfully solved in previous e-consultations.

12 The use of e-consultation does not change ordinary treatment liabilities for the GP. Patients should  
13 use the service according to the information provided on the national health portal. The GP must  
14 independently assess whether the information provided by the patient is sufficient to be able to deliver  
15 proper health care. The GP must ask the patient to book an ordinary appointment if in doubt about  
16 whether a request can be resolved through an e-consultation. A specific tariff for e-consultation had  
17 been introduced since 2016. The e-consultation must include a medical assessment of the patient's  
18 request and is considered completed when the doctor has processed the inquiry and given the patient  
19 an answer. The GP is obliged to answer the patient's inquiry within 5 working days.

## 20 **Study design**

21 We conducted an online survey of citizens who had activated their personal account at the national  
22 health portal helsenorge.no and accessed at least one of the digital health services with the GP by  
23 November 2017. The survey was available after secure login on the national health portal  
24 helsenorge.no from November 14, 2017 to November 28, 2017. All active users received an invitation  
25 through a pop-up window with a brief description of the study and a link to the survey.

1  
2 1 The online survey included a total of 29 questions distributed over six pages. All mandatory questions  
3  
4 2 had to be completed before moving to the next page. Questions regarding demographic characteristics  
5  
6 3 of the users and use of the services were presented in two different pages. Moreover, for each of the  
7  
8 4 four e-health services with the GP, respondents were asked about their experiences with the service  
9  
10 5 and the time spent using the service compared to conventional methods (e.g. phone, office visit).  
11  
12 6 Demographic characteristics of the users included information on gender, age, education level,  
13  
14 7 health-related background, computer literacy, and work status. Use of the services was explored  
15  
16 8 through questions related to which of the four e-health services had been accessed by the respondents  
17  
18 9 and, for electronic booking of appointments only, which of the two possible options was used.  
19  
20 10 Patients' experiences with the services were evaluated through a number of questions concerning  
21  
22 11 perceived benefits (quality of care, communication with the GP office, formulation of an inquiry,  
23  
24 12 efficiency) and satisfaction (with technology, security, information and educational material, overall  
25  
26 13 satisfaction, and future use).  
27  
28 14 Questions on demographic characteristics and use of the services were multiple choice with a number  
29  
30 15 of alternatives ranging from 2 to 8 depending on the questions. Questions concerning users'  
31  
32 16 experiences were scored on a 5-point Likert scale (1=strongly agree, 2=agree, 3=neutral, 4=disagree,  
33  
34 17 5=strongly disagree). Respondents were also able to refrain from providing an answer by selecting  
35  
36 18 "no opinion". Four non-mandatory open-ended questions were also included so that respondents  
37  
38 19 could provide additional feedbacks on their experience with each of the four e-health services.  
39  
40 20 The online survey was developed by the Norwegian Centre for E-health Research in collaboration  
41  
42 21 with the Centre for Quality Improvement in Medical Practice (SKIL) and the Norwegian Directorate  
43  
44 22 of eHealth. The survey was published on the national health portal helsenorge.no by the Norwegian  
45  
46 23 Directorate of eHealth. The link to the survey was available for a period of 2 weeks. All information  
47  
48 24 collected through the survey was anonymized and not personally identifiable. The Checklist for  
49  
50 25 Reporting Results of Internet E-Surveys (CHERRIES) was used to develop the survey and report its  
51  
52  
53  
54  
55  
56  
57  
58  
59  
60

1 results [33]. The online survey was developed with the online data collection solution Questback  
2 Essentials (Oslo, Norway) and its technical functionality tested before being published.

### 3 **Data analysis**

4 Data analysis was performed by the Norwegian Centre for E-health Research from January 2017 to  
5 April 2018. All questionnaires received and analyzed were completed. Respondents were analyzed  
6 by gender and age according to the following groups: 16-24 year, 25-34 year, 35-44 year, 45-54 year,  
7 55-64 year, and over 65 year. Population data for the year 2017 were retrieved from Statistics Norway  
8 and used to compare the demographic characteristics of the users of digital health services in primary  
9 care with patients attending their GP face-to-face and the general population. Participation and  
10 completion rates were not reported as data on unique visitors were not available. The selection of  
11 respondents to this survey was assumed to be representative of those who actually used the services.  
12 Data on patients' use and experiences with the service were summarized by descriptive statistics as  
13 well as by diagrams. In the analysis of the questions concerning users' satisfaction with the service,  
14 results were summarized by the proportion of respondents who agreed with a certain aspect (scores  
15 1 and 2) and those who disagreed (scores 4 and 5). Differences between time spent using e-  
16 consultation and other digital health services with the GP and time spent via conventional methods  
17 (e.g. phone, office visit) were analyzed with the Wilcoxon signed-rank test. A P-value < 0.05 was  
18 considered significant. Data were extracted in Excel and further analyzed in IBM SPSS Statistics  
19 (Version 25.0, Armonk, NY: IBM Corp.).

20 Qualitative data provided in the open text fields for each of the four e-health services were used to  
21 support and supplement the quantitative data. The content of these answers was analyzed and  
22 categorized into "positive" (e.g. perceived benefits, good user experiences), "neutral" or "negative"  
23 (perceived disadvantages, poor user experiences, suggestions for service improvement). Answers  
24 categorized as "negative" were further analyzed in detail as these were found to be more significant  
25 and diverse than those categorized as "positive" (often described by short statements such as  
26 "working fine for me"). Answers were subject to a content analysis [34] and summarized into two

1  
2 1 levels: i) common opinions reported by several respondents, and ii) individual opinions containing  
3  
4 2 strong anecdotal experiences.

### 7 3 **Patient and public involvement**

8  
9  
10 4 The four e-health services evaluated in this study were part of a national initiative led by the  
11  
12 5 Norwegian Directorate of eHealth. The services were implemented on a large-scale and accessible to  
13  
14 6 residents in Norway from the national health portal helsenorge.no. Patient involvement in the design  
15  
16 7 and conduct of our research was beyond the scope of the study. The results of this study, however,  
17  
18 8 are intended to be disseminated to the public as well as to health authorities to support the further  
19  
20 9 development of these services and their features.

## 24 10 **Results**

### 28 11 **Characteristics of the users**

29  
30 12 In total 2,043 users answered to the survey [**Table 1**]. There was a higher proportion of women among  
31  
32 13 users of digital health services in primary care (64.9%) compared to citizens attending their GP face-  
33  
34 14 to-face (59.4%) and the general population (49.8%). Users in all age groups accessed the services.  
35  
36 15 There was a higher proportion of younger users [**Supplementary file 1**] compared to citizens  
37  
38 16 attending their GP face-to-face [**Supplementary file 2**] and the general population [**Supplementary**  
39  
40 17 **file 3**]. Moreover, there were more women among younger users, while there were more men among  
41  
42 18 older users.

43  
44  
45  
46  
47 19 Over half of the users (59%) had an education at university level or higher. Only 5.8% of the  
48  
49 20 respondents had an education at primary or secondary school level. About a fourth of the respondents  
50  
51 21 had a background as health professionals. The vast majority of the respondents described their data  
52  
53 22 literacy as average or above average, while only 5.4% of the users had a low data literacy. Over half  
54  
55 23 of the respondents was working at the time they answered to this survey.

### 59 24 **Patients' use of the services**

1  
2 1 Electronic booking of appointments was the most used of the four digital health services with the GP  
3  
4 2 (66.4%), followed by electronic prescription renewal (54.3%) [Table 2]. The two other services  
5  
6 3 which implied a dialogue the GP office were used to a lesser degree. Almost half of the respondents  
7  
8 4 accessed only one of the four digital health services, while only 7.6% of the respondents used all the  
9  
10 5 services. Electronic booking via the GP's calendar was the most commonly used option to book  
11  
12 6 appointments, while sending an electronic inquiry for an appointment with a text-based message was  
13  
14 7 reported as less used. About 20% of the respondents used both solutions.  
15  
16  
17

### 18 8 **Electronic booking of appointments**

19  
20  
21 9 Over 80% of the respondents considered it easier to book an appointment through the electronic  
22  
23 10 service compared to booking via phone or SMS [Figure 2]. Over half of the users agreed that they  
24  
25 11 could book an appointment at a more appropriate time and within shorter time. Most users agreed  
26  
27 12 that the technology worked well (90%), that the service was safe (93%) and that the information  
28  
29 13 provided on how to use the service was sufficient (81%). Overall, the vast majority of the users were  
30  
31 14 satisfied with the service (90%) and would recommend its use to others (85%).  
32  
33  
34

35  
36 15 Over 80% of the respondents agreed that they saved time by booking an appointment electronically  
37  
38 16 [Figure 2]. Data showed that, while patients used on average 13.5 minutes (median 10 min) to book  
39  
40 17 an appointment by phone, it took only 4.4 minutes (median 4 min) to book an appointment  
41  
42 18 electronically via helsenorge.no, meaning a time saving of 9.1 minutes (-67.4%). The difference was  
43  
44 19 statistically significant ( $p < 0.001$ ).  
45  
46  
47

### 48 20 **Electronic prescription renewal**

49  
50 21 Over 90% of the respondents thought that it was easier to renew a prescription electronically than by  
51  
52 22 phone [Figure 2]. Most users (76%) agreed that they obtained a better overview of their medications  
53  
54 23 after using the service, and about half of the respondents (46%) reported that it was easier to follow  
55  
56 24 their doctors' advice on use of medications. Most users agreed that the technology worked well  
57  
58 25 (93%), that the service was safe (95%) and that the information provided on how to use the service  
59  
60

1  
2 1 was sufficient (81%). Overall, respondents were highly satisfied with the service (93%) and would  
3  
4 2 recommend its use to others (88%).  
5

6  
7 3 Over 90% of the users agreed that they saved time by renewing a prescription electronically [**Figure**  
8  
9 4 **2**]. Patients saved, on average, 10.5 minutes (-70.9%) each time they renewed a prescription  
10  
11 5 electronically compared to a renewal by phone ( $p<0.001$ ). While it took 14.8 minutes (median 12.5  
12  
13 6 min) to request to renew a prescription by phone, an electronic prescription renewal via helsenorge.no  
14  
15 7 took only 4.3 minutes (median 3.5 min).  
16  
17

### 18 19 8 **Electronic contact with the GP office**

20  
21  
22 9 Over 80% of the respondents agreed that the service allowed for an easier communication with the  
23  
24 10 GP office [**Figure 2**]. In particular, 60% of the users thought that it was easier to submit an inquiry  
25  
26 11 electronically than by phone. The vast majority of the users agreed that the technology worked well  
27  
28 12 (87%) and that the service was safe (91%). While the majority of the users (69%) was satisfied with  
29  
30 13 the information provided on how to use the service, a higher percentage (11%) compared to the other  
31  
32 14 services thought that the information was not sufficient. Overall, most users were satisfied with the  
33  
34 15 service (82%) and would recommend its use to others (77%).  
35  
36

37  
38 16 Three-fourths (76%) of the respondents agreed that they saved time by sending an electronic enquiry  
39  
40 17 to the GP office rather than taking contact by phone [**Figure 2**]. Data showed that, while patients used  
41  
42 18 on average 15.2 minutes (median 12.5) to the GP office by phone, it took only 5.7 minutes (median  
43  
44 19 5 min) to send an electronic inquiry via helsenorge.no, with a consequent time saving of 9.5 minutes  
45  
46 20 (-62.5%). The difference was statistically significant ( $p<0.001$ ).  
47  
48

### 49 50 21 **E-consultation**

51  
52  
53 22 Results showed that 72% of the respondents experienced a better follow-up by their GP as a  
54  
55 23 consequence of using e-consultation, and an additional 58% reported improved quality of their  
56  
57 24 treatment [**Figure 2**]. While 41% of the respondents agreed that it was easier to explain a clinical  
58  
59 25 problem by written message than by oral communication, 24% expressed their preference towards a  
60

1  
2 1 traditional face-to-face appointment. The out-of-pocket fee was deemed to be acceptable by 64% of  
3  
4 2 the respondents. Most users agreed that the technology worked well (92%) and that the service was  
5  
6 3 safe (92%). As for electronic contact with the GP office, 11% of the users thought that the information  
7  
8 4 provided on how to use the service was not sufficient. Overall, respondents were very satisfied with  
9  
10 5 the service (85%) and would recommend its use to others (81%).

11  
12  
13  
14 6 Almost 90% of the users agreed that they saved time by sending a clinical inquiry via the service  
15  
16 7 compared to attending a face-to-face visit. [Figure 2]. Patients saved, on average, more than one hour  
17  
18 8 (72.3 minutes; -88.5%) each time they used an e-consultation instead of a face-to-face appointment  
19  
20 9 (p<0.001). While it took, on average, 81.7 minutes (median 60 min) for a face-to-face appointment  
21  
22 10 (including travel time, waiting time, and visit time), an online text-based clinical consultation with  
23  
24 11 the GP took only 9.4 minutes (median 7.5 min).

## 25 26 27 28 12 **Qualitative feedback on the services**

29  
30  
31 13 A total of 656 comments were provided in the open text fields. Most of the comments concerned the  
32  
33 14 electronic booking of appointments, while e-consultation had the lowest number of answers. About  
34  
35 15 half of the comments were categorized as negative feedbacks describing perceived disadvantages,  
36  
37 16 poor user experiences, as well as suggestions for service improvement, such as new functionalities.  
38  
39 17 The most commonly occurring responses and some individual opinions were selected for each service  
40  
41 18 [Table 3]. Moreover, four common themes across services were identified.

### 42 43 44 45 19 *Safety and security*

46  
47  
48 20 Respondents pointed out that they were uncertain about who read the information they submitted (e.g.  
49  
50 21 receptionist, GP). Moreover, they indicated the need for a confirmation that the request was sent and  
51  
52 22 received by the GP office, and information on when they could expect an answer.

### 53 54 55 23 *User friendliness*

56  
57  
58 24 Several respondents pointed out that the interface was generally slow and little intuitive, and that it  
59  
60 25 worked poorly on certain web browsers, operating systems and devices.



### 1 2 1 *Time utilization*

3  
4  
5 2 Some respondents indicated that the time elapsed from when they contacted the GP office until they  
6  
7 3 received an answer was perceived as more important than the time spent in using the service,  
8  
9 4 depending on the nature of the problem, occupational status and personal characteristics. GP offices  
10  
11 5 tend to keep a few slots daily available for acute visits, which can only be booked by phone. On the  
12  
13  
14 6 one hand, if patients wanted to visit their GP as soon as possible, they might prefer to book an  
15  
16 7 appointment by phone. On the other hand, full-time workers who do not have urgent issues would  
17  
18 8 value the possibility of asynchronous communication and spend the least amount of time.

### 21 9 *Functionality for parents*

22  
23  
24 10 Many of the respondents pointed out the lack of a functionality to manage their children's medical  
25  
26 11 contact through the services.

## 29 12 **Discussion**

30  
31  
32  
33 13 The «Digital dialogue with the general practitioner» introduced in Norway since 2016 is one of the  
34  
35 14 first examples of nationwide implementation of digital health services for citizens in primary care.  
36  
37 15 The current study provides evidence on patients' use and experiences with e-consultation and other  
38  
39 16 digital health services with their GP. Overall, the services have been used by early adopters  
40  
41  
42 17 (approximately 25% of all GPs offices) and the trend over the first years of implementation shows a  
43  
44 18 steadily growing nationwide adoption [Figure 1]. According to the technology adoption curve [35],  
45  
46 19 the majority of users is expected to adopt the services within the next few years. From January 2018  
47  
48 20 to October 2018, the use of e-consultations in Norway grew from 0.8% to 2.2% of the total number  
49  
50  
51 21 of consultations with the GP [36], thus exceeding levels reported by other studies. In a retrospective  
52  
53 22 observational study, even though email consultation was adopted by 52.8% of the general practices  
54  
55 23 in the Netherlands in 2014, only 0.7% of the GP consultations were by email [14]. Future use of e-  
56  
57 24 consultations in Norway is estimated to account to 30% of all consultations with the GP [36], and up  
58  
59 25 to 40% if supported by apps and wearables [37]. Similarly, regions in Denmark have recently set a

1 political ambition that one third of all consultations with the GP will be digital [38]. While electronic  
2 booking of appointments and electronic prescription renewal seem to be widely used by patients in  
3 Norway, the e-consultation service for medical inquiries with the GP office is still used at a lower  
4 degree, as indicated in a recent qualitative study [39]. Our findings are in line with other studies where  
5 the use of e-consultation was low compared to use of electronic communication for administrative  
6 requests, such as repeat prescriptions and test results [7,19,24]. In the UK, the low uptake of  
7 alternatives to face-to-face consultations might be explained by the fact that users are still early  
8 adopters [2].

9 Time saving (work, travel, waiting) represents the most evident benefit for patients. In a study on use  
10 of e-mail communication with the GP, 95% of the users perceived it as more efficient than the phone  
11 [8]. In the current survey, the majority of patients (85%, 92%, 76% and 89% for electronic booking  
12 of appointments, electronic prescription renewal, electronic contact with the GP office and e-  
13 consultation, respectively) agreed that the services were time saving. This was confirmed by the  
14 differences in time spent using the digital health services compared to conventional approaches, all  
15 found to be statistically significant. The highest efficiency (-88.5%) was estimated for e-consultations  
16 compared to face-to-face appointments. However, some users indicated that the time elapsed from  
17 when they contacted the GP office until they received an answer was more important than the time  
18 spent in using the service. Response time is recognized as an important factor in the delivery of digital  
19 health services in primary care. Findings from previous studies reported that the majority of patients  
20 received a response within 2 days [6,24] and that a slow response was the main reason for  
21 dissatisfaction [6]. Despite e-consultations implemented in Norway are used for non-urgent health  
22 issues only, and the GP is obliged to answer the patient's inquiry within 5 working days, quicker  
23 response times might further improve patient satisfaction.

24 Most users seemed to acknowledge the practical utility of digital services with their GP. Patients  
25 could easily and efficiently book an appointment electronically, at a time more appropriate to them  
26 and with a shorter waiting time compared to booking via phone. Electronic prescription renewals

1  
2 1 were also preferred to renewals made at the GP office. Patients also recognized that they obtained a  
3  
4 2 better overview of their medications and even a higher compliance. For non-clinical inquiries, most  
5  
6 3 respondents thought that it was easier to write electronic messages to the GP office than communicate  
7  
8 4 by phone. For clinical enquiries, many patients agreed that use of e-consultation could lead to a better  
9  
10 5 follow-up and even to improved quality of treatment, as suggested by other studies [8]. These were,  
11  
12 6 however, perceived benefits. More systematic research is needed to measure objectively clinical and  
13  
14 7 other outcomes of interest, including cost-effectiveness and health service resource use [13]. Users  
15  
16 8 seemed to be generally satisfied with their ability to explain a problem via e-consultation. Compared  
17  
18 9 to oral communication, written communication has been considered more intimate [40], as patients  
19  
20 10 can feel more emboldened to ask questions electronically [8]. Moreover, electronic messages can  
21  
22 11 support patients aiding recall and providing evidence of the exchange [8,9]. However, it is important  
23  
24 12 that messages are concise, formal, and medically relevant [7].

25  
26  
27  
28  
29  
30 13 The overall satisfaction expressed by the respondents of this survey with e-consultation and digital  
31  
32 14 health services with their GP was very high. Such result is not surprising and confirms that patients  
33  
34 15 have a positive attitude towards e-health services in primary care [19]. Electronic communication  
35  
36 16 with the GP office has been considered convenient [2,10,26,40,41], appropriate [7,22], accessible  
37  
38 17 [4,6,40], and easy to use [4,6] by patients. Moreover, despite providers' reluctance [1] and concerns  
39  
40 18 about patients' inappropriate and inefficient use of the technology [7], patients find the electronic  
41  
42 19 communication with their GPs efficient compared to phone or face-to-face contacts [2,6,8]. The  
43  
44 20 results from our survey indicated that the information provided to patients on how to use the services  
45  
46 21 was generally satisfactory, but could be improved. GPs previously reported that the service designed  
47  
48 22 for administrative electronic communication with the GP office was sometimes confused by patients  
49  
50 23 with the medical e-consultation service [39]. Such confusion was also expressed by a number of  
51  
52 24 respondents to this survey. Improved patient education is needed to avoid improper use and  
53  
54 25 inefficiency [8]. Other suggestions were provided in the open text fields. Some users expressed their  
55  
56 26 wish to use the services on behalf of their children. Furthermore, the need for a receipt (e.g. that the

1  
2 1 request has been successfully delivered, read by the receiver or being handled) was in demand. As  
3  
4 2 these services were new, the frustration caused by technical issues could make some people who try  
5  
6 3 them for the first time to go back to the traditional alternatives. It is therefore important to make the  
7  
8 4 services functional on all platforms and easily accessible to all users, as well as provide adequate  
9  
10 5 training [42].  
11  
12

13  
14 6 The results from this survey confirm that users of digital health services in primary care are more  
15  
16 7 likely to be women [21,24,36,43] and younger adults [2,5,8,17,21,36,43]. These services seem to be  
17  
18 8 more attractive to digitally active users with a higher education, as also reported by other studies [8].  
19  
20 9 Over half of the users (59%) had an education at university level, which is high compared to the  
21  
22 10 general population and those accessing their GP face-to-face. Data from Statistics Norway show that,  
23  
24 11 in 2017, 33.4% of the total population over 16 in Norway had an education at university level.  
25  
26 12 Moreover, the vast majority of the respondents (94.6%) described their data literacy as average or  
27  
28 13 above average. Consequently, elderly and people with low computer literacy might still need  
29  
30 14 traditional alternatives [38]. Despite these digital health services currently catering to competent  
31  
32 15 health users, less competent users would still benefit indirectly if such services succeed in freeing up  
33  
34 16 resources in primary care. Reduced phone load, increased efficiency, released time for medical  
35  
36 17 assessments and less crowded waiting rooms are, for example, advantages for GP offices which have  
37  
38 18 been acknowledged in a recent study conducted on GP's perceptions towards the use of "Digital  
39  
40 19 dialogue with the General Practitioner" [39]. In addition to the day-to-day efficiency gains, it is also  
41  
42 20 possible to envision that a robust and well-established suite of services for electronic communication  
43  
44 21 can be a useful tool for managing situations where in-person attendance to the GP office is less  
45  
46 22 desired, or when capacity needs to be reserved to critical cases, such as during pandemic outbreaks  
47  
48 23 or large-scale emergencies.  
49  
50  
51  
52  
53  
54

### 55 24 *Study strengths and limitations*

56  
57

58 25 GPs and citizens using digital health services in Norway are early adopters who might have a more  
59  
60 26 positive attitude towards innovation than the general population and thus be more enthusiastic and

1  
2 1 inclined to use the services. Moreover, respondents might overall have a better level of satisfaction  
3  
4 2 than non-respondents. The information regarding the number of unique users of the services was not  
5  
6 3 available due to privacy issues related to the national platform. As a consequence, the potential  
7  
8 4 number of patients who were eligible for this survey was unknown and it was not possible to calculate  
9  
10 5 a response rate. Despite this, the high number of respondents in this survey is considered to be  
11  
12 6 representative of those who used the services.  
13  
14  
15

16 7 The comments provided in the open text fields were optional, and thus the qualitative results only  
17  
18 8 reflect the opinion of a minority of users who were sufficiently motivated to provide a feedback. It is  
19  
20 9 also commonly observed that responses in open text fields can have a negativity bias compared to  
21  
22 10 structured surveys [44]. However, the open text responses in this study provided interesting insights  
23  
24 11 and useful suggestions for improvement.  
25  
26  
27

## 28 12 **Conclusions**

29  
30  
31  
32 13 Citizens using e-consultation and other digital health services with their GP in Norway are highly  
33  
34 14 satisfied and consider them as useful and efficient alternatives to conventional approaches. These  
35  
36 15 digital health services are currently catering to competent health users, mostly women, younger  
37  
38 16 adults, and digitally active citizens with high education. It is important to make the services functional  
39  
40 17 on all platforms and provide adequate information and training so that they become easily accessible  
41  
42 18 to all users, including citizens who are not digitally active.  
43  
44  
45  
46  
47  
48

## 49 20 **List of abbreviations**

50  
51 21 **GP:** general practitioner

52  
53  
54 22 **E-consultation:** electronic consultation

55  
56  
57 23 **EPR:** electronic patient record  
58  
59  
60 24

## 1 **Declarations**

## 2 **Funding**

3 This study was funded by the Norwegian Centre for E-health Research as part of the project  
4 “Nytteeffektene av digitale helsetjenester”.

## 5 **Competing interests**

6 The authors declare that they have no competing interests.

## 7 **Authors' contributions**

8 PZ contributed to the conception and design of the study, acquisition of data, analysis and  
9 interpretation of data, drafting and revision of the manuscript. AJF contributed to the conception and  
10 design of the study, analysis and interpretation of data, and revision of the manuscript. All authors  
11 read and approved the final manuscript.

## 12 **Ethics approval and consent to participate**

13 All information collected through the survey was anonymous and not personally identifiable. The  
14 participation to the survey was based on consent wherein the respondent could choose not to answer  
15 the questionnaire. Ethics approval from the Regional Committees for Medical and Health Research  
16 Ethics was not deemed necessary according to the Act on medical and health research (the Health  
17 Research Act) entered into force in Norway in 2009.

## 18 **Data sharing**

19 The dataset analyzed during the current study is available from the corresponding author on  
20 reasonable request.

## 21 **Acknowledgements**

1  
2 1 We thank the Norwegian Directorate of eHealth for publishing the survey on the national portal  
3  
4 2 helsenorge.no. The publication charges for this article have been funded by a grant from the  
5  
6 3 publication fund of UiT The Arctic University of Norway.  
7  
8

9  
10 4 **Word count**  
11

12  
13 5 6112 words.  
14  
15  
16  
17  
18  
19  
20  
21  
22  
23  
24  
25  
26  
27  
28  
29  
30  
31  
32  
33  
34  
35  
36  
37  
38  
39  
40  
41  
42  
43  
44  
45  
46  
47  
48  
49  
50  
51  
52  
53  
54  
55  
56  
57  
58  
59  
60

For peer review only

## References

1. **Brant** H, Atherton H, Ziebland S, McKinstry B, Campbell JL, Salisbury C. Using alternatives to face-to-face consultations: a survey of prevalence and attitudes in general practice. *Br J Gen Pract*. 2016 Jul;66(648):e460-6. PMID: 27215571
2. **Atherton** H, Brant H, Ziebland S, Bikker A, Campbell J, Gibson A, McKinstry B, Porqueddu T, Salisbury C. The potential of alternatives to face-to-face consultation in general practice, and the impact on different patient groups: a mixed-methods case study. Southampton (UK): NIHR Journals Library; 2018 Jun. (Health Services and Delivery Research, No. 6.20.) Available from: <https://www.ncbi.nlm.nih.gov/books/NBK507060/>
3. **Santana** S, Lausen B, Bujnowska-Fedak M, Chronaki CE, Prokosch HU, Wynn R. Informed citizen and empowered citizen in health: results from an European survey. *BMC Fam Pract*. 2011 Apr 16;12:20. PMID: 21496309
4. **Tjora** A, Tran T, Faxvaag A. Privacy vs usability: a qualitative exploration of patients' experiences with secure Internet communication with their general practitioner. *J Med Internet Res*. 2005 May 31;7(2):e15. PMID: 15998606
5. **Mehrotra** A, Paone S, Martich GD, Albert SM, Shevchik GJ. Characteristics of patients who seek care via eVisits instead of office visits. *Telemed J E Health*. 2013 Jul;19(7):515-9. PMID: 23682589
6. **Liederman** EM, Morefield CS. Web messaging: a new tool for patient-physician communication. *J Am Med Inform Assoc*. 2003 May-Jun;10(3):260-70. PMID: J Am Med Inform Assoc. 2003 May-Jun;10(3):260-70. PMID: 12626378
7. **White** CB, Moyer CA, Stern DT, Katz SJ. A content analysis of e-mail communication between patients and their providers: patients get the message. *J Am Med Inform Assoc*. 2004 Jul-Aug;11(4):260-7. PMID: 15064295
8. **Houston** TK, Sands DZ, Jenckes MW, Ford DE. Experiences of patients who were early adopters of electronic communication with their physician: satisfaction, benefits, and concerns. *Am J Manag Care*. 2004 Sep;10(9):601-8. PMID: 15515992
9. **Car** J, Sheikh A. Email consultations in health care: 2--acceptability and safe application. *BMJ*. 2004 Aug 21;329(7463):439-42. PMID: BMJ. 2004 Aug 21;329(7463):439-42. PMID: 15321903
10. **Virji** A, Yarnall KS, Krause KM, Pollak KI, Scannell MA, Gradison M, Østbye T. Use of email in a family practice setting: opportunities and challenges in patient- and physician-initiated communication. *BMC Med*. 2006 Aug 15;4:18. PMID: 16911780
11. **Atherton** H, Sawmynaden P, Sheikh A, Majeed A, Car J. Email for clinical communication between patients/caregivers and healthcare professionals. *Cochrane Database Syst Rev*. 2012 Nov 14;11:CD007978. PMID: 23152249
12. **Sawmynaden** P, Atherton H, Majeed A, Car J. Email for the provision of information on disease prevention and health promotion. *Cochrane Database Syst Rev*. 2012 Nov 14;11:CD007982. PMID: 23152250
13. **Atherton** H. Use of email for consulting with patients in general practice. *Br J Gen Pract*. 2013 Mar;63(608):118-9. PMID: 23561755
14. **Huygens** MWJ, Swinkels ICS, Verheij RA, Friele RD, van Schayck OCP, de Witte LP. Understanding the use of email consultation in primary care using a retrospective observational study with data of Dutch electronic health records. *BMJ Open*. 2018 Jan 21;8(1):e019233. PMID: 29358442
15. **Helse- og omsorgsdepartementet**. Høring: Forslag til ny forskrift om pasientjournal (pasientjournalforskriften). 2018. [https://www.regjeringen.no/contentassets/bc66ebd8e7714bf6b0f3753e7c1dcdca/hoerings\\_pasientjournalforskriften.pdf](https://www.regjeringen.no/contentassets/bc66ebd8e7714bf6b0f3753e7c1dcdca/hoerings_pasientjournalforskriften.pdf) Accessed 21 February 2020
16. **Chan** B, Lyles C, Kaplan C, Lam R, Karliner L. A Comparison of Electronic Patient-Portal Use Among Patients with Resident and Attending Primary Care Providers. *J Gen Intern Med*. 2018 Dec;33(12):2085-2091. PMID: 30187376
17. **Van den Bulck** SA, Hermens R, Slegers K, Vandenberghe B, Goderis G, Vankrunkelsven P. Designing a Patient Portal for Patient-Centered Care: Cross-Sectional Survey. *J Med Internet Res*. 2018 Oct 1;20(10):e269. PMID: 30287416
18. **NHS UK**. About GP online services <https://www.england.nhs.uk/gp-online-services/about-the-prog/> Accessed 21 February 2020
19. **Mohammed** MA, Montague J, Faisal M, Lamming L. The value of a Patient Access Portal in primary care: a cross-sectional survey of 62,486 registered users in the UK. *Univ Access Inf Soc* 2019. <https://doi.org/10.1007/s10209-019-00693-8>
20. **Beaney** P, Odulaja A, Hadley A, Prince C, Obe RC. GP Online: turning expectations into reality with the new NHS app. *Br J Gen Pract*. 2019 Apr;69(681):172-173. PMID: 30745356
21. **Eccles** A, Hopper M, Turk A, Atherton H. Patient use of an online triage platform: a mixed-methods retrospective exploration in UK primary care. *Br J Gen Pract*. 2019 May;69(682):e336-e344. PMID: 30910874
22. **Albert** SM, Shevchik GJ, Paone S, Martich GD. Internet-based medical visit and diagnosis for common medical problems: experience of first user cohort. *Telemed J E Health*. 2011 May;17(4):304-8. PMID: 21457013
23. **Baker** L, Rideout J, Gertler P, Raube K. Effect of an Internet-based system for doctor-patient communication on health care spending. *J Am Med Inform Assoc*. 2005 Sep-Oct;12(5):530-6. PMID: 15905484
24. **Edwards** HB, Marques E, Hollingworth W, Horwood J, Farr MI, Bernard E, Salisbury C, Northstone K. Use of a primary care online consultation system, by whom, when and why: evaluation of a pilot observational study in 36 general practices in South West England. *BMJ Open*. 2017 Nov 22;7(11):e016901. PMID: 29167106
25. **Iacobucci** G. NHS long term plan: all patients to have access to online GP consultations by 2023-24. *BMJ*. 2019 Jan 8;364:187. PMID: BMJ. 2019 Jan 8;364:187.
26. **Powell** RE, Henstenburg JM, Cooper G, Hollander JE, Rising KL. Patient Perceptions of Telehealth Primary Care Video Visits. *Ann Fam Med*. 2017 May;15(3):225-229. PMID: 28483887
27. **Randhawa** RS, Chandan JS, Thomas T, Singh S. An exploration of the attitudes and views of general practitioners on the use of video consultations in a primary healthcare setting: a qualitative pilot study. *Prim Health Care Res Dev*. 2019 Jan;20:e5. PMID: 29909798
28. **Jiwa** M, Meng X. Video consultation use by Australian general practitioners: video vignette study. *J Med Internet Res*. 2013 Jun 19;15(6):e117. PMID: 23782753
29. **Sørensen** T, Johansen MA. Developing and Implementing Patients' Full-Scale Electronic Access to Their Health Record. *Stud Health Technol Inform*. 2016;228:85-9. PMID: 27577347
30. **Helsedirektoratet**. Digital dialog mellom pasient og fastlege: nåsituasjon. Delleveranse i arbeid med gevinstrealisering. 2014.
31. **Himmelstein** DU, Woolhandler S. Hope and hype: predicting the impact of electronic medical records. *Health Aff (Millwood)*. 2005 Sep-Oct;24(5):1121-3. PMID: 16162553



- 1  
2  
3  
4  
5  
6  
7  
8  
9  
10  
11  
12  
13  
14  
15  
16  
17  
18  
19  
20  
21  
22  
23  
24  
25  
26  
27  
28  
29  
30  
31  
32  
33  
34  
35  
36  
37  
38  
39  
40  
41  
42  
43  
44  
45  
46  
47  
48  
49  
50  
51  
52  
53  
54  
55  
56  
57  
58  
59  
60
32. **Ross** J, Stevenson F, Lau R, Murray E. Factors that influence the implementation of e-health: a systematic review of systematic reviews (an update). *Implement Sci*. 2016 Oct 26;11(1):146. PMID: 27782832
33. **Eysenbach** G. Improving the quality of Web surveys: the Checklist for Reporting Results of Internet E-Surveys (CHERRIES). *J Med Internet Res*. 2004 Sep 29;6(3):e34. PMID: 15471760
34. **Hsieh** H, Shannon SE. Three approaches to qualitative content analysis. *Qual Health Res* 2005 Nov;15(9):1277-1288. PMID: 16204405
35. **Rogers** EM. *Diffusion of innovations*. New York: The Free Press; 1983.
36. **Helsedirektoratet**, Direktoratet for e-helse. E-konsultasjon hos fastlege og legevakt. Rapport til helse- og omsorgsdepartementet. 2018. [https://www.helsedirektoratet.no/rapporter/e-konsultasjon-helsedirektoratet-og-direktoratet-for-e-helse/E-konsultasjon%20hos%20fastlege%20og%20legevakt%202018.pdf/\\_attachment/inline/8b3f4e77-4511-4500-8194-cb1a634c0c23:84604a3c7260d55cec2336507f3c7a504e5e29a7/E-konsultasjon%20hos%20fastlege%20og%20legevakt%202018.pdf](https://www.helsedirektoratet.no/rapporter/e-konsultasjon-helsedirektoratet-og-direktoratet-for-e-helse/E-konsultasjon%20hos%20fastlege%20og%20legevakt%202018.pdf/_attachment/inline/8b3f4e77-4511-4500-8194-cb1a634c0c23:84604a3c7260d55cec2336507f3c7a504e5e29a7/E-konsultasjon%20hos%20fastlege%20og%20legevakt%202018.pdf) Accessed 21 February 2020.
37. **Accenture**. Vårt nye digitale norge. Fremtidige muligheter og hva som kreves for å lykkes med digitalisering av offentlige tjenester. [https://www.accenture.com/\\_acnmedia/PDF-59/Accenture-Digitale-Norge-2.pdf#zoom=50](https://www.accenture.com/_acnmedia/PDF-59/Accenture-Digitale-Norge-2.pdf#zoom=50) Accessed 21 February 2020.
38. **Danske regioner**. Trygt, nært og nemt. Regionernes strategi for fremtidens sundhedsvæsen. 2018. <http://www.e-pages.dk/regioner/148/html5/> Accessed 21 February 2020.
39. **Fagerlund** AJ, Holm IM, Zanaboni P. General practitioners' perceptions towards the use of digital health services for citizens in primary care: a qualitative interview study. *BMJ Open*. 2019 May 5;9(5):e028251. PMID: 31061056
40. **Katz** SJ, Moyer CA, Cox DT, Stern DT. Effect of a triage-based E-mail system on clinic resource use and patient and physician satisfaction in primary care: a randomized controlled trial. *J Gen Intern Med*. 2003 Sep;18(9):736-44. PMID: 12950483
41. **Leong** SL, Gingrich D, Lewis PR, Mauger DT, George JH. Enhancing doctor-patient communication using email: a pilot study. *J Am Board Fam Pract*. 2005 May-Jun;18(3):180-8. PMID: 15879565
42. **Lugtenberg** M, Pasveer D, van der Weijden T, Westert GP, Kool RB. Exposure to and experiences with a computerized decision support intervention in primary care: results from a process evaluation. *BMC Fam Pract*. 2015 Oct 16;16:141. PMID: 26474603
43. **Socialstyrelsen**. Digitala vårdtjänster riktade till patienter. Kartläggning och uppföljning. 2018. <https://www.socialstyrelsen.se/globalassets/sharepoint-dokument/artikelkatalog/ovrigt/2018-6-15.pdf> Accessed 21 February 2020.
44. **Poncheri** RM, Lindberg JT, Thompson LF, Surface EA. A Comment on Employee Surveys: Negativity Bias in Open-Ended Responses. *Organizational Research Methods*. 2008;11(3):614-630.

# Tables

**Table 1.** Demographic characteristics of the users.

|                                         |              |
|-----------------------------------------|--------------|
| Users (n)                               | 2,043        |
| Gender, n (%)                           |              |
| Male                                    | 717 (35.1%)  |
| Female                                  | 1326 (64.9%) |
| Age, n (%)                              |              |
| 16-24                                   | 153 (7.5%)   |
| 25-34                                   | 394 (19.3%)  |
| 35-44                                   | 350 (17.1%)  |
| 45-54                                   | 440 (21.5%)  |
| 55-64                                   | 387 (18.9%)  |
| over 65                                 | 319 (15.6%)  |
| Education, n (%)                        |              |
| Primary school / lower secondary school | 119 (5.8%)   |
| High school (general)                   | 407 (19.9%)  |
| High school (vocational)                | 304 (14.9%)  |
| University (3 years)                    | 644 (31.5%)  |
| University (more than 3 years)          | 569 (27.9%)  |
| Health-related background, n (%)        |              |
| Yes                                     | 509 (24.9%)  |
| No                                      | 1534 (75.1%) |
| Data literacy, n (%)                    |              |
| Far below average                       | 24 (1.2%)    |
| Below average                           | 86 (4.2%)    |
| Average                                 | 984 (48.2%)  |
| Above average                           | 738 (36.1%)  |
| Far above average                       | 211 (10.3%)  |
| Work status, n (%)                      |              |
| Working                                 | 1159 (56.7%) |
| Homemaker                               | 15 (0.7%)    |
| Retired                                 | 266 (13.0%)  |
| Unemployed                              | 44 (2.2%)    |
| Student                                 | 132 (6.5%)   |
| Sick leave                              | 187 (9.2%)   |
| Disability pension                      | 186 (9.1%)   |
| Other                                   | 54 (2.6%)    |

1  
2  
3  
4  
5  
6  
7  
8  
9  
10  
11  
12  
13  
14  
15  
16  
17  
18  
19  
20  
21  
22  
23  
24  
25  
26  
27  
28  
29  
30  
31  
32  
33  
34  
35  
36  
37  
38  
39  
40  
41  
42  
43  
44  
45  
46  
47  
48  
49  
50  
51  
52  
53  
54  
55  
56  
57  
58  
59  
60

**Table 2.** Patients' use of e-consultation and other digital health services with the GP.

|                                                   |              |
|---------------------------------------------------|--------------|
| Access to services, n (%)                         |              |
| electronic booking of appointments                | 1356 (66.4%) |
| electronic prescription renewal                   | 1109 (54.3%) |
| electronic contact with the GP office             | 528 (25.8%)  |
| e-consultation                                    | 762 (37.3%)  |
| Number of services accessed by respondents, n (%) |              |
| 1                                                 | 982 (48.1%)  |
| 2                                                 | 566 (27.7%)  |
| 3                                                 | 339 (16.6%)  |
| 4                                                 | 156 (7.6%)   |
| Use of electronic booking of appointments, n (%)  |              |
| GP's calendar                                     | 793 (58.5%)  |
| electronic inquiry                                | 294 (21.7%)  |
| both                                              | 269 (19.8%)  |

**Table 3.** Most commonly occurring responses and selected anecdotal statements the for the four e-health services.

|                                                                      |                                                                      |
|----------------------------------------------------------------------|----------------------------------------------------------------------|
| <b>Electronic booking of appointments</b>                            |                                                                      |
| <i>Common responses</i>                                              | <i>Selected anecdotal responses</i>                                  |
| Want to be able to book urgent appointments                          | The availability of bookable slots is poor                           |
| Want the possibility to book appointment for own children            | Want the possibility to cancel appointments                          |
| Want to be able to attach a comment to the appointment enquiry       | Want a mobile application with push notifications                    |
| <b>Electronic prescription renewal</b>                               |                                                                      |
| <i>Common responses</i>                                              | <i>Selected anecdotal responses</i>                                  |
| Want a receipt that the enquiry is sent and estimated time to answer | Hard to spell the medical names correctly                            |
| Want a list of expired prescriptions with a "renew" button           | Risk to mix up prescriptions (e.g. melting tablets, debot tablets)   |
| Want the possibility to manage own children's prescriptions          | Poor readability when lists are long and complicated                 |
| <b>Electronic contact with the GP office</b>                         |                                                                      |
| <i>Common responses</i>                                              | <i>Selected anecdotal responses</i>                                  |
| Want a receipt that the message is read                              | Easier to call by phone than to write                                |
| Service can be confused with e-consultation                          | Uncertain about who reads the message                                |
| Service not easy to navigate                                         | Want to send a message on behalf of own children                     |
| <b>E-consultation</b>                                                |                                                                      |
| <i>Common responses</i>                                              | <i>Selected anecdotal responses</i>                                  |
| Unreasonable that out-of-pocket payment is charged                   | Want a receipt that the message is read and estimated time to answer |
| The present limit of 1,000 characters for messages is too short      | Want the possibility to write on behalf of own children              |
| Want an autosave function so that the text is not lost while writing | Written communication is not suited for clinical contact             |

## Figures

**Figure 1.** GP offices adopting the “Digital dialogue with the general practitioner”.

**Figure 2.** Patients’ experiences, perceived benefits and satisfaction with the four e-health services.

For peer review only

## Supplementary files

**Supplementary file 1.** Distribution (%) of users of digital health services with the GP by gender and age groups.

**Supplementary file 2.** Distribution (%) of face-to-face consultations with the GP by gender and age groups.

**Supplementary file 3.** Distribution (%) of the general population by gender and age groups.

For peer review only

# GP offices adopting digital dialogue

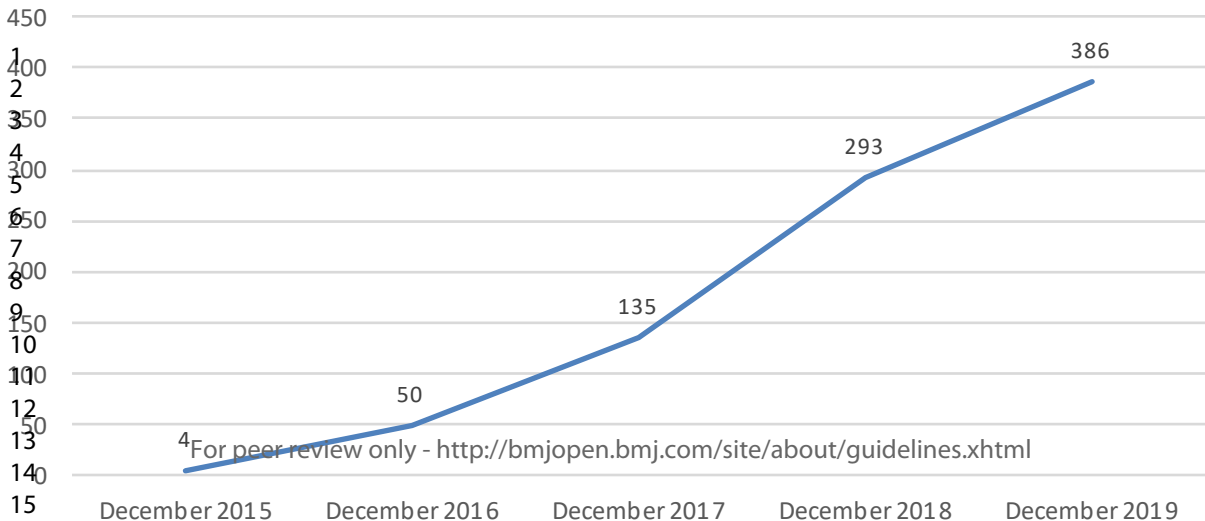

<sup>4</sup>For peer review only - <http://bmjopen.bmj.com/site/about/guidelines.xhtml>

### Electronic booking of appointments

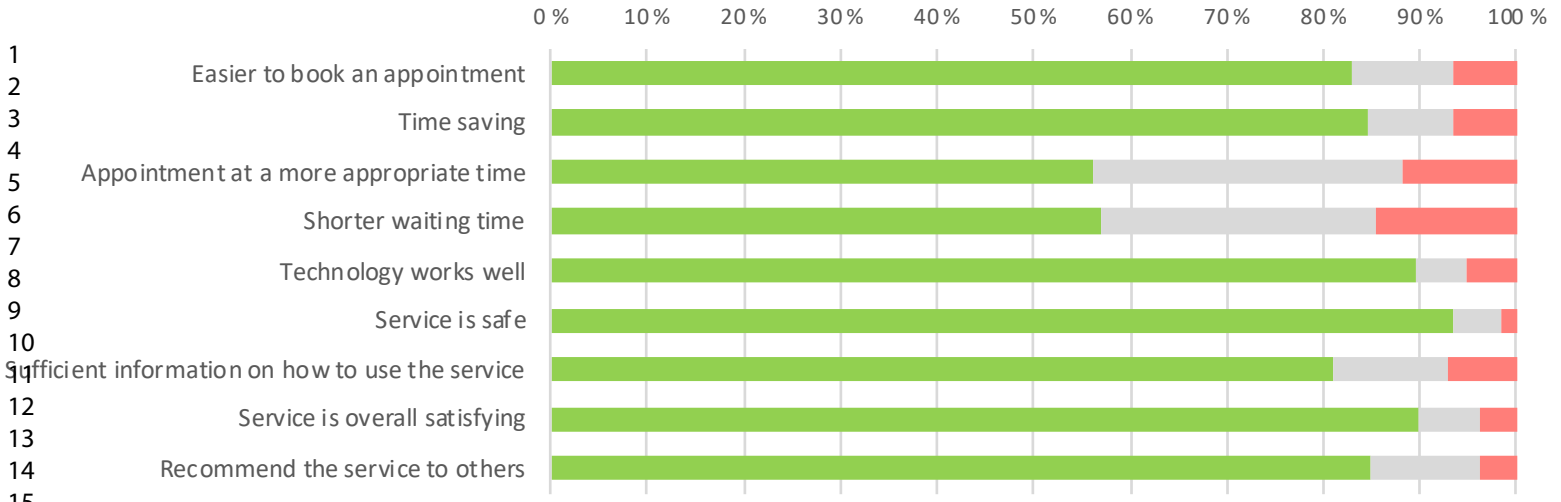

### Electronic prescription renewal

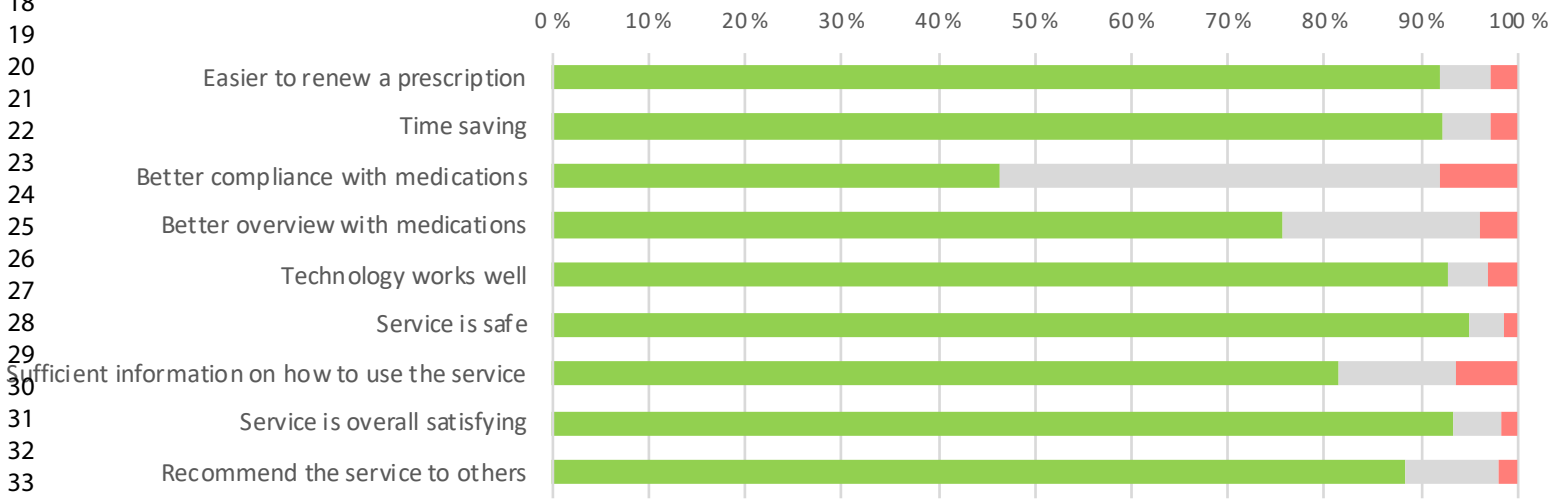

### Electronic contact with the GP office

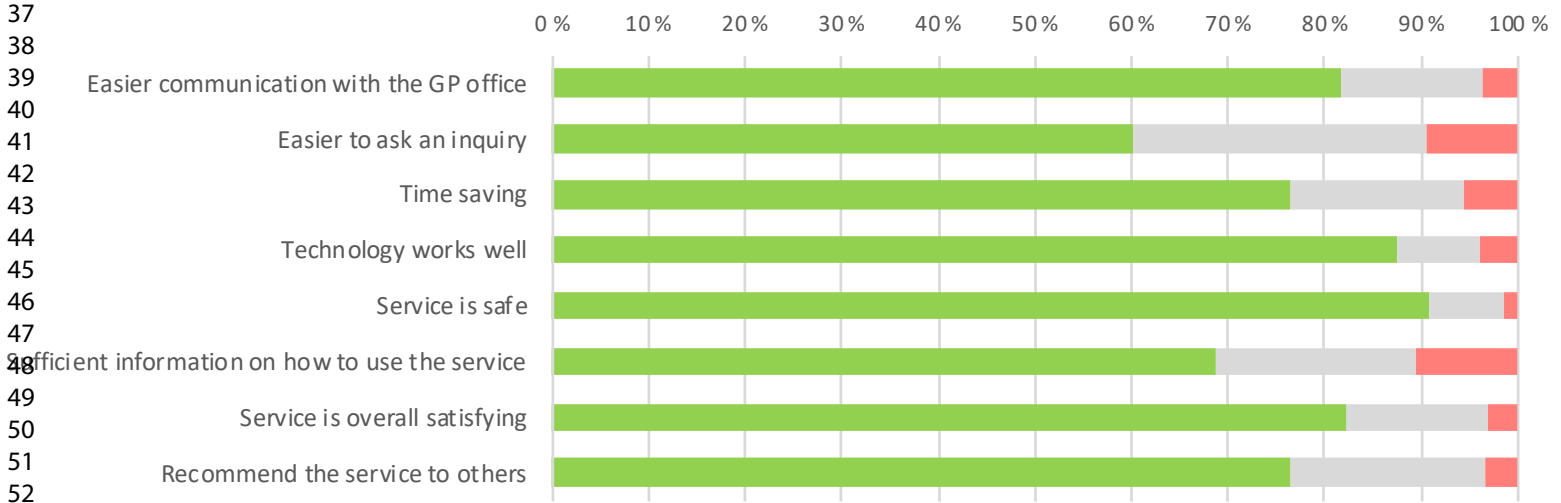

### E-consultation

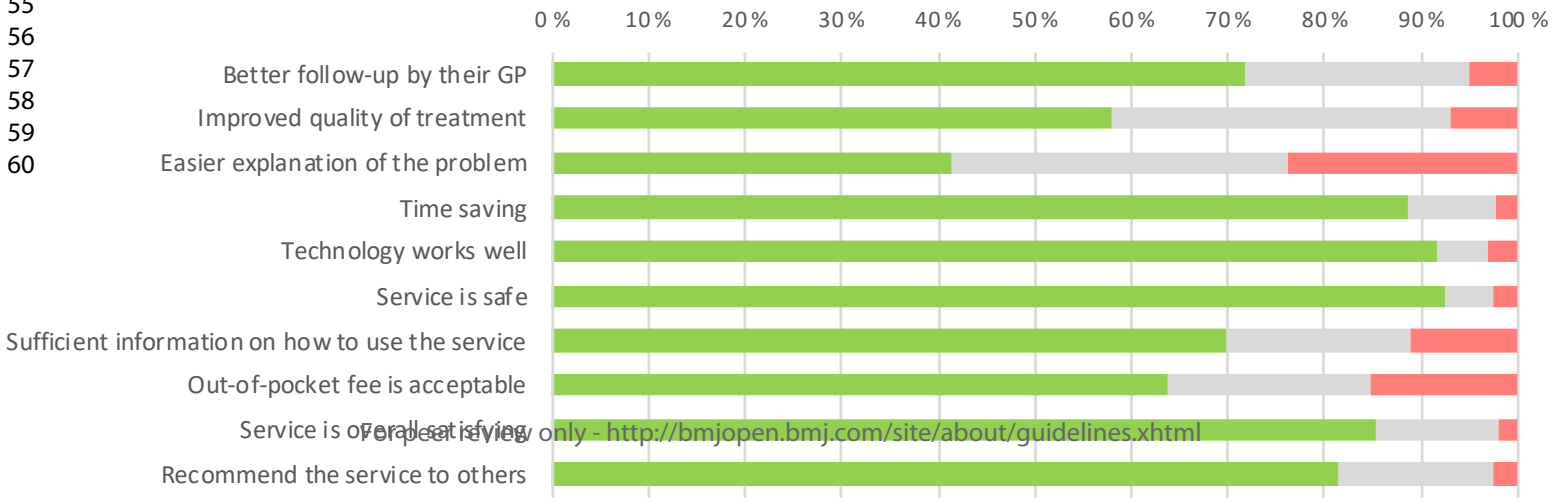

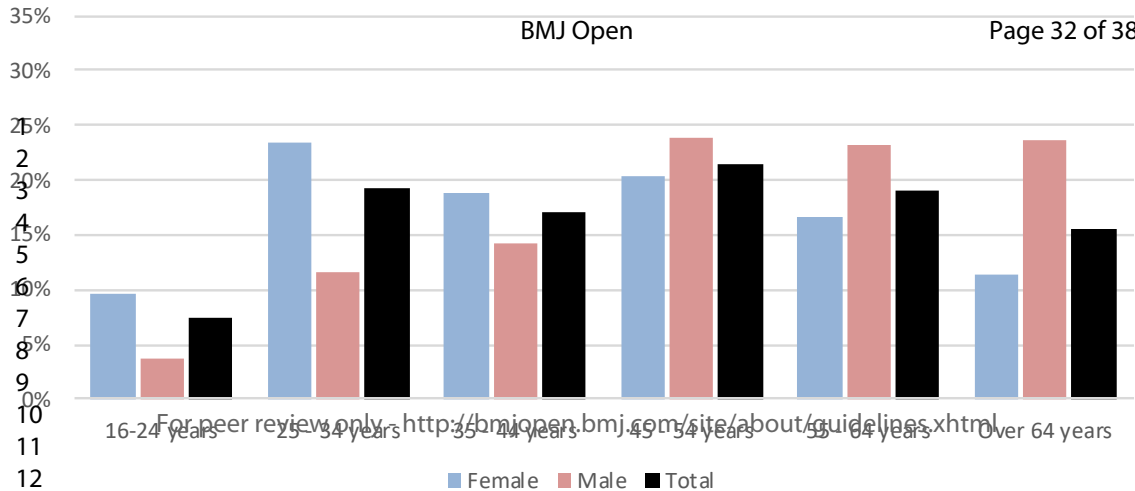



# BMJ Open

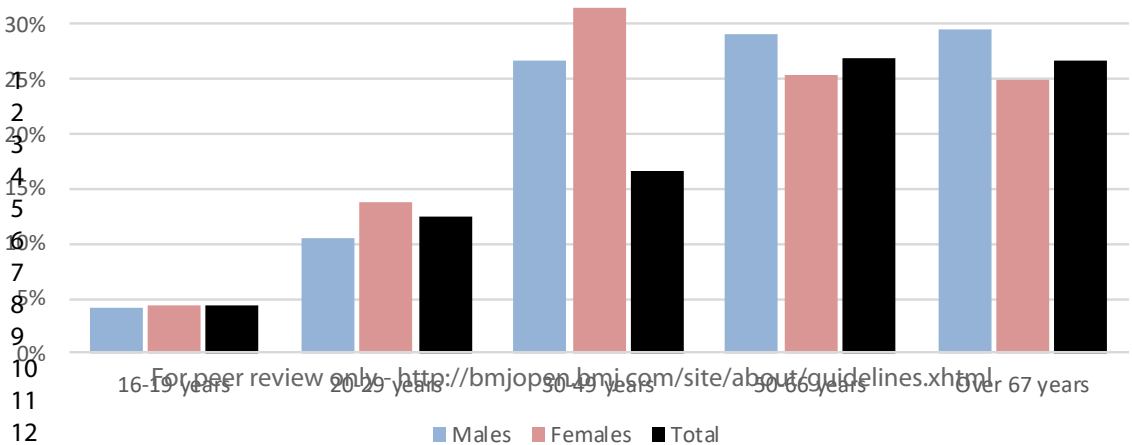

For peer review only - <http://bmjopen.bmj.com/site/about/guidelines.xhtml>

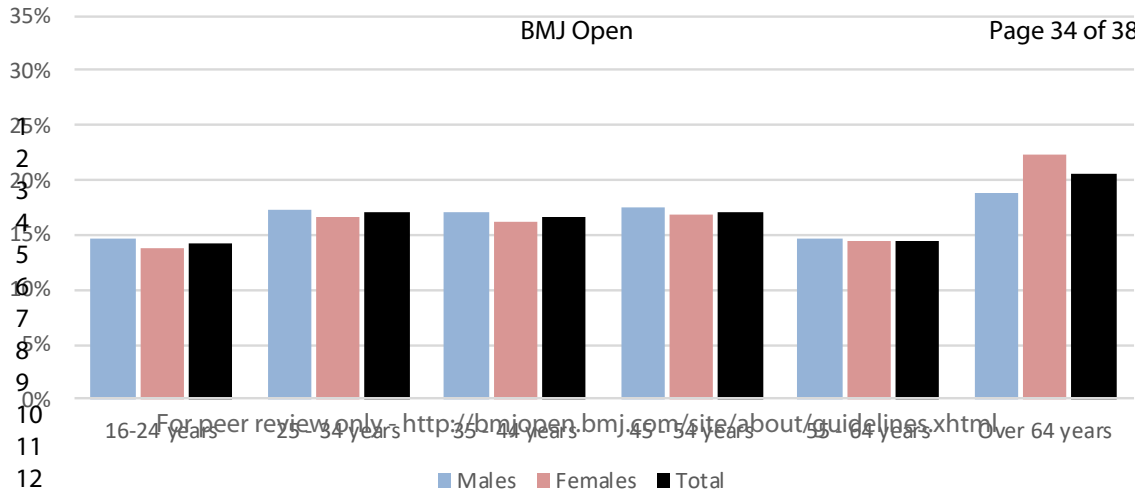

For peer review only. <http://bmjopen.bmj.com/site/about/guidelines.xhtml>

■ Males ■ Females ■ Total

## Checklist for Reporting Results of Internet E-Surveys (CHERRIES)

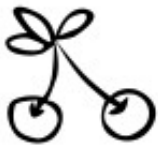
**Checklist for Reporting Results of Internet E-Surveys  
(CHERRIES)**

| <i>Item Category</i>                                                                        | <i>Checklist Item</i>            | <i>Explanation</i>                                                                                                                                                                                                   | <i>Page no.</i> |
|---------------------------------------------------------------------------------------------|----------------------------------|----------------------------------------------------------------------------------------------------------------------------------------------------------------------------------------------------------------------|-----------------|
| <b>Design</b>                                                                               | Describe survey design           | Describe target population, sample frame. Is the sample a convenience sample? (In “open” surveys this is most likely.)                                                                                               | 9               |
| <b>IRB (Institutional Review Board) approval and informed consent process</b>               | IRB approval                     | Mention whether the study has been approved by an IRB.                                                                                                                                                               | 21              |
|                                                                                             | Informed consent                 | Describe the informed consent process. Where were the participants told the length of time of the survey, which data were stored and where and for how long, who the investigator was, and the purpose of the study? | 21              |
|                                                                                             | Data protection                  | If any personal information was collected or stored, describe what mechanisms were used to protect unauthorized access.                                                                                              | N/A             |
| <b>Development and pre-testing</b>                                                          | Development and testing          | State how the survey was developed, including whether the usability and technical functionality of the electronic questionnaire had been tested before fielding the questionnaire.                                   | 10              |
| <b>Recruitment process and description of the sample having access to the questionnaire</b> | Open survey versus closed survey | An “open survey” is a survey open for each visitor of a site, while a closed survey is only open to a sample which the investigator knows (password-protected survey).                                               |                 |

|                                          |                                                                                                                                                                                                                                                                                                                                                                                                                                              |     |
|------------------------------------------|----------------------------------------------------------------------------------------------------------------------------------------------------------------------------------------------------------------------------------------------------------------------------------------------------------------------------------------------------------------------------------------------------------------------------------------------|-----|
| Contact mode                             | Indicate whether or not the initial contact with the potential participants was made on the Internet. (Investigators may also send out questionnaires by mail and allow for Web-based data entry.)                                                                                                                                                                                                                                           | 9   |
| Advertising the survey                   | How/where was the survey announced or advertised? Some examples are offline media (newspapers), or online (mailing lists – If yes, which ones?) or banner ads (Where were these banner ads posted and what did they look like?). It is important to know the wording of the announcement as it will heavily influence who chooses to participate. Ideally the survey announcement should be published as an appendix.                        | 9   |
| Web/E-mail                               | State the type of e-survey (eg, one posted on a Web site, or one sent out through e-mail). If it is an e-mail survey, were the responses entered manually into a database, or was there an automatic method for capturing responses?                                                                                                                                                                                                         | 9   |
| Context                                  | Describe the Web site (for mailing list/newsgroup) in which the survey was posted. What is the Web site about, who is visiting it, what are visitors normally looking for? Discuss to what degree the content of the Web site could pre-select the sample or influence the results. For example, a survey about vaccination on a anti-immunization Web site will have different results from a Web survey conducted on a government Web site | 10  |
| Mandatory/voluntary                      | Was it a mandatory survey to be filled in by every visitor who wanted to enter the Web site, or was it a voluntary survey?                                                                                                                                                                                                                                                                                                                   | 9   |
| Incentives                               | Were any incentives offered (eg, monetary, prizes, or non-monetary incentives such as an offer to provide the survey results)?                                                                                                                                                                                                                                                                                                               | N/A |
| Time/Date                                | In what timeframe were the data collected?                                                                                                                                                                                                                                                                                                                                                                                                   | 9   |
| Randomization of items or questionnaires | To prevent biases items can be randomized or alternated.                                                                                                                                                                                                                                                                                                                                                                                     | N/A |
| Adaptive questioning                     | Use adaptive questioning (certain items, or only conditionally displayed based on responses to other items) to reduce number and complexity of the questions.                                                                                                                                                                                                                                                                                | N/A |

1  
2  
3  
4  
5  
6  
7  
8  
9  
10  
11  
12  
13  
14  
15  
16  
17  
18 **Survey**  
19 **administration**  
20

|    |                                                                                                           |                                                                                                                                                                                                                                                                                                                                                                                                                                                                                               |     |
|----|-----------------------------------------------------------------------------------------------------------|-----------------------------------------------------------------------------------------------------------------------------------------------------------------------------------------------------------------------------------------------------------------------------------------------------------------------------------------------------------------------------------------------------------------------------------------------------------------------------------------------|-----|
| 1  | Number of Items                                                                                           | What was the number of questionnaire items per page? The number of items is an important factor for the completion rate.                                                                                                                                                                                                                                                                                                                                                                      | 10  |
| 2  |                                                                                                           |                                                                                                                                                                                                                                                                                                                                                                                                                                                                                               |     |
| 3  | Number of screens                                                                                         | Over how many pages was the questionnaire distributed? The number of items is an                                                                                                                                                                                                                                                                                                                                                                                                              | 10  |
| 4  | (pages)                                                                                                   | important factor for the completion rate.                                                                                                                                                                                                                                                                                                                                                                                                                                                     |     |
| 5  |                                                                                                           |                                                                                                                                                                                                                                                                                                                                                                                                                                                                                               |     |
| 6  |                                                                                                           |                                                                                                                                                                                                                                                                                                                                                                                                                                                                                               |     |
| 7  | Completeness check                                                                                        | It is technically possible to do consistency or completeness checks before the questionnaire is submitted. Was this done, and if “yes”, how (usually JavaScript)? An alternative is to check for completeness after the questionnaire has been submitted (and highlight mandatory items). If this has been done, it should be reported. All items should provide a non-response option such as “not applicable” or “rather not say”, and selection of one response option should be enforced. | 10  |
| 8  |                                                                                                           |                                                                                                                                                                                                                                                                                                                                                                                                                                                                                               |     |
| 9  |                                                                                                           |                                                                                                                                                                                                                                                                                                                                                                                                                                                                                               |     |
| 10 |                                                                                                           |                                                                                                                                                                                                                                                                                                                                                                                                                                                                                               |     |
| 11 |                                                                                                           |                                                                                                                                                                                                                                                                                                                                                                                                                                                                                               |     |
| 12 |                                                                                                           |                                                                                                                                                                                                                                                                                                                                                                                                                                                                                               |     |
| 13 |                                                                                                           |                                                                                                                                                                                                                                                                                                                                                                                                                                                                                               |     |
| 14 |                                                                                                           |                                                                                                                                                                                                                                                                                                                                                                                                                                                                                               |     |
| 15 |                                                                                                           |                                                                                                                                                                                                                                                                                                                                                                                                                                                                                               |     |
| 16 |                                                                                                           |                                                                                                                                                                                                                                                                                                                                                                                                                                                                                               |     |
| 17 |                                                                                                           |                                                                                                                                                                                                                                                                                                                                                                                                                                                                                               |     |
| 18 |                                                                                                           |                                                                                                                                                                                                                                                                                                                                                                                                                                                                                               |     |
| 19 |                                                                                                           |                                                                                                                                                                                                                                                                                                                                                                                                                                                                                               |     |
| 20 |                                                                                                           |                                                                                                                                                                                                                                                                                                                                                                                                                                                                                               |     |
| 21 | Review step                                                                                               | State whether respondents were able to review and change their answers (eg, through a Back button or a Review step which displays a summary of the responses and asks the respondents if they are correct).                                                                                                                                                                                                                                                                                   | N/A |
| 22 |                                                                                                           |                                                                                                                                                                                                                                                                                                                                                                                                                                                                                               |     |
| 23 |                                                                                                           |                                                                                                                                                                                                                                                                                                                                                                                                                                                                                               |     |
| 24 |                                                                                                           |                                                                                                                                                                                                                                                                                                                                                                                                                                                                                               |     |
| 25 |                                                                                                           |                                                                                                                                                                                                                                                                                                                                                                                                                                                                                               |     |
| 26 |                                                                                                           |                                                                                                                                                                                                                                                                                                                                                                                                                                                                                               |     |
| 27 |                                                                                                           |                                                                                                                                                                                                                                                                                                                                                                                                                                                                                               |     |
| 28 | <b>Response rates</b>                                                                                     |                                                                                                                                                                                                                                                                                                                                                                                                                                                                                               |     |
| 29 |                                                                                                           |                                                                                                                                                                                                                                                                                                                                                                                                                                                                                               |     |
| 30 | Unique site visitor                                                                                       | If you provide view rates or participation rates, you need to define how you determined a unique visitor. There are different techniques available, based on IP addresses or cookies or both.                                                                                                                                                                                                                                                                                                 | 11  |
| 31 |                                                                                                           |                                                                                                                                                                                                                                                                                                                                                                                                                                                                                               |     |
| 32 |                                                                                                           |                                                                                                                                                                                                                                                                                                                                                                                                                                                                                               |     |
| 33 |                                                                                                           |                                                                                                                                                                                                                                                                                                                                                                                                                                                                                               |     |
| 34 |                                                                                                           |                                                                                                                                                                                                                                                                                                                                                                                                                                                                                               |     |
| 35 |                                                                                                           |                                                                                                                                                                                                                                                                                                                                                                                                                                                                                               |     |
| 36 |                                                                                                           |                                                                                                                                                                                                                                                                                                                                                                                                                                                                                               |     |
| 37 | View rate (Ratio of unique survey visitors/unique site visitors)                                          | Requires counting unique visitors to the first page of the survey, divided by the number of unique site visitors (not page views!). It is not unusual to have view rates of less than 0.1 % if the survey is voluntary.                                                                                                                                                                                                                                                                       | N/A |
| 38 |                                                                                                           |                                                                                                                                                                                                                                                                                                                                                                                                                                                                                               |     |
| 39 |                                                                                                           |                                                                                                                                                                                                                                                                                                                                                                                                                                                                                               |     |
| 40 |                                                                                                           |                                                                                                                                                                                                                                                                                                                                                                                                                                                                                               |     |
| 41 |                                                                                                           |                                                                                                                                                                                                                                                                                                                                                                                                                                                                                               |     |
| 42 |                                                                                                           |                                                                                                                                                                                                                                                                                                                                                                                                                                                                                               |     |
| 43 | Participation rate (Ratio of unique visitors who agreed to participate/unique first survey page visitors) | Count the unique number of people who filled in the first survey page (or agreed to participate, for example by checking a checkbox), divided by visitors who visit the first page of the survey (or the informed consents page, if present). This can also be called “recruitment” rate.                                                                                                                                                                                                     | 11  |
| 44 |                                                                                                           |                                                                                                                                                                                                                                                                                                                                                                                                                                                                                               |     |
| 45 |                                                                                                           |                                                                                                                                                                                                                                                                                                                                                                                                                                                                                               |     |
| 46 |                                                                                                           |                                                                                                                                                                                                                                                                                                                                                                                                                                                                                               |     |
| 47 |                                                                                                           |                                                                                                                                                                                                                                                                                                                                                                                                                                                                                               |     |
| 48 |                                                                                                           |                                                                                                                                                                                                                                                                                                                                                                                                                                                                                               |     |
| 49 |                                                                                                           |                                                                                                                                                                                                                                                                                                                                                                                                                                                                                               |     |
| 50 |                                                                                                           |                                                                                                                                                                                                                                                                                                                                                                                                                                                                                               |     |
| 51 |                                                                                                           |                                                                                                                                                                                                                                                                                                                                                                                                                                                                                               |     |
| 52 | Completion rate (Ratio of users who finished the survey/users who agreed to participate)                  | The number of people submitting the last questionnaire page, divided by the number of people who agreed to participate (or submitted the first survey page). This is only relevant if there is a separate “informed consent” page or if the survey goes over several pages. This is a measure for attrition. Note that “completion” can involve leaving questionnaire items blank. This is not a                                                                                              | 11  |
| 53 |                                                                                                           |                                                                                                                                                                                                                                                                                                                                                                                                                                                                                               |     |
| 54 |                                                                                                           |                                                                                                                                                                                                                                                                                                                                                                                                                                                                                               |     |
| 55 |                                                                                                           |                                                                                                                                                                                                                                                                                                                                                                                                                                                                                               |     |
| 56 |                                                                                                           |                                                                                                                                                                                                                                                                                                                                                                                                                                                                                               |     |
| 57 |                                                                                                           |                                                                                                                                                                                                                                                                                                                                                                                                                                                                                               |     |
| 58 |                                                                                                           |                                                                                                                                                                                                                                                                                                                                                                                                                                                                                               |     |
| 59 |                                                                                                           |                                                                                                                                                                                                                                                                                                                                                                                                                                                                                               |     |
| 60 |                                                                                                           |                                                                                                                                                                                                                                                                                                                                                                                                                                                                                               |     |

**Preventing multiple  
 entries from the  
 same individual**

|                                                          |                                                                                                                                                                                                                                                                                                                                                                                                                                                                                                                                                                            |     |
|----------------------------------------------------------|----------------------------------------------------------------------------------------------------------------------------------------------------------------------------------------------------------------------------------------------------------------------------------------------------------------------------------------------------------------------------------------------------------------------------------------------------------------------------------------------------------------------------------------------------------------------------|-----|
| Cookies used                                             | Indicate whether cookies were used to assign a unique user identifier to each client computer. If so, mention the page on which the cookie was set and read, and how long the cookie was valid. Were duplicate entries avoided by preventing users access to the survey twice; or were duplicate database entries having the same user ID eliminated before analysis? In the latter case, which entries were kept for analysis (eg, the first entry or the most recent)?                                                                                                   | N/A |
| IP check                                                 | Indicate whether the IP address of the client computer was used to identify potential duplicate entries from the same user. If so, mention the period of time for which no two entries from the same IP address were allowed (eg, 24 hours). Were duplicate entries avoided by preventing users with the same IP address access to the survey twice; or were duplicate database entries having the same IP address within a given period of time eliminated before analysis? If the latter, which entries were kept for analysis (eg, the first entry or the most recent)? | N/A |
| Log file analysis                                        | Indicate whether other techniques to analyze the log file for identification of multiple entries were used. If so, please describe.                                                                                                                                                                                                                                                                                                                                                                                                                                        | N/A |
| Registration                                             | In “closed” (non-open) surveys, users need to login first and it is easier to prevent duplicate entries from the same user. Describe how this was done. For example, was the survey never displayed a second time once the user had filled it in, or was the username stored together with the survey results and later eliminated? If the latter, which entries were kept for analysis (eg, the first entry or the most recent)?                                                                                                                                          | 9   |
| <b>Analysis</b><br>Handling of incomplete questionnaires | Were only completed questionnaires analyzed? Were questionnaires which terminated early (where, for example, users did not go through all questionnaire pages) also analyzed?                                                                                                                                                                                                                                                                                                                                                                                              | 11  |

1  
2  
3  
4  
5  
6  
7  
8  
9  
10  
11  
12  
13  
14  
15  
16  
17  
18  
19  
20  
21  
22  
23  
24  
25  
26  
27  
28  
29  
30  
31  
32  
33  
34  
35  
36  
37  
38  
39  
40  
41  
42  
43  
44  
45  
46  
47  
48  
49  
50  
51  
52  
53  
54  
55  
56  
57  
58  
59  
60

|                                                     |                                                                                                                                                                                                                                                                      |     |
|-----------------------------------------------------|----------------------------------------------------------------------------------------------------------------------------------------------------------------------------------------------------------------------------------------------------------------------|-----|
| Questionnaires submitted with an atypical timestamp | <p>BMJ Open</p> <p>Some investigators may measure the time people needed to fill in a questionnaire and exclude questionnaires that were submitted too soon. Specify the timeframe that was used as a cut-off point, and describe how this point was determined.</p> | N/A |
| Statistical correction                              | <p>Indicate whether any methods such as weighting of items or propensity scores have been used to adjust for the non-representative sample; if so, please describe the methods.</p>                                                                                  | N/A |

For peer review only
