# Supplementary figures and images for: Patients’ use and experiences with e-consultation and other digital health services with their general practitioner in Norway: results from an online survey
Source: PubMed Central journal article supplement — BMJ Open. 2020 Jun 17;10(6):e034773. doi: 10.1136/bmjopen-2019-034773 (PMC7304835; doi:10.1136/bmjopen-2019-034773), 2020-06-17

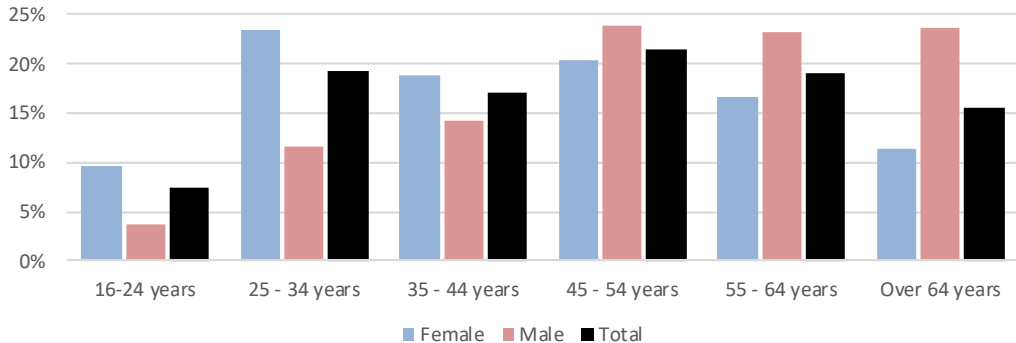

Supplement: bmjopen-2019-034773supp001.pdf [file bmjopen-2019-034773supp001.pdf]

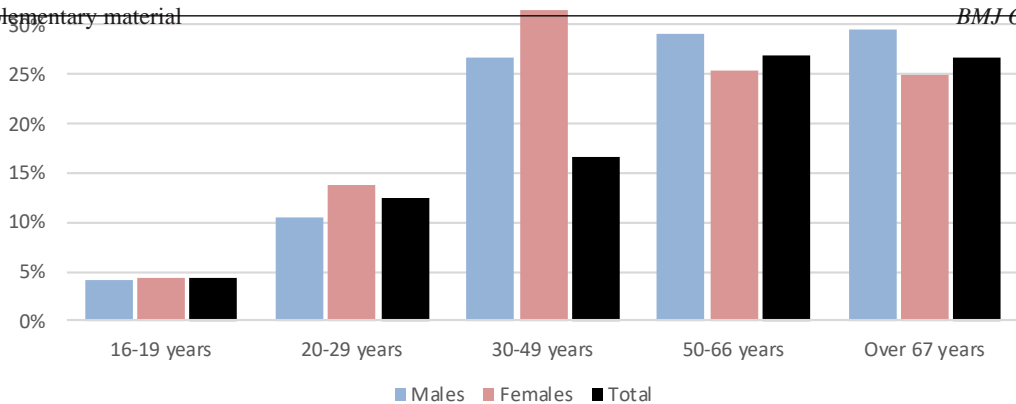

Supplement: bmjopen-2019-034773supp002.pdf [file bmjopen-2019-034773supp002.pdf]

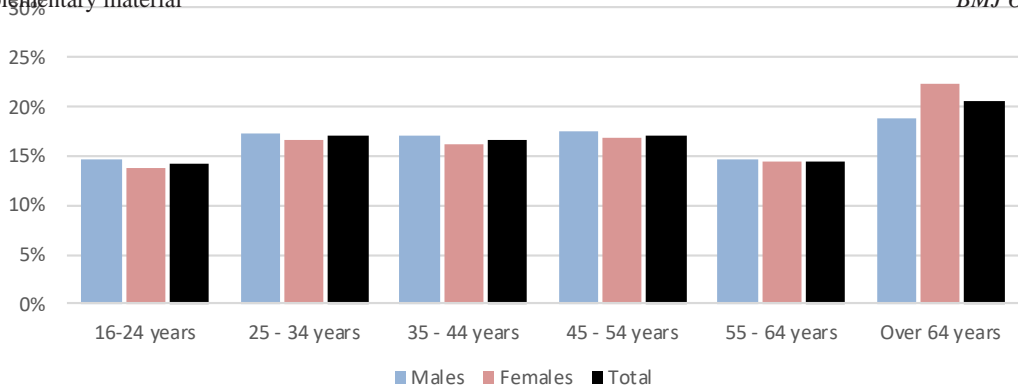

Supplement: bmjopen-2019-034773supp003.pdf [file bmjopen-2019-034773supp003.pdf]
